1 **TAOK2 is an ER-localized Kinase that Catalyzes the Dynamic Tethering of**  
2 **ER to Microtubules**

3

4 *Kimya Nourbakhsh<sup>1#</sup>, Amy A. Ferreccio<sup>1#</sup>, Matthew J. Bernard<sup>1</sup> and Smita Yadav<sup>1\*</sup>*

5 *# denotes equal contribution*

6 *<sup>1</sup>. Department of Pharmacology, University of Washington, Seattle, WA 98195*

7 *\* Corresponding author, [smitay@uw.edu](mailto:smitay@uw.edu)*

8

9 **Summary**

10 The endoplasmic reticulum (ER) depends on extensive association with the microtubule  
11 cytoskeleton for its structure, function and mitotic inheritance. The identity of molecular  
12 tethers that mediate ER-microtubule coupling, and mechanisms through which dynamic  
13 tethering is regulated are poorly understood. Here, we identify, Thousand And One  
14 amino acid Kinase 2 (TAOK2) as a pleiotropic protein kinase that mediates tethering of  
15 ER to microtubules. We show that TAOK2 is a unique multipass membrane spanning  
16 serine/threonine kinase localized in distinct ER domains via four transmembrane and  
17 amphipathic helices. Using *in vitro* and cellular assays, we find that TAOK2 directly binds  
18 microtubules with high affinity. We define the minimal TAOK2 determinants that induce  
19 ER-microtubule tethering, and delineate the mechanism for its autoregulation. While ER  
20 membrane dynamics are increased in TAOK2 knockout cells, the movement of ER along  
21 growing microtubule plus-ends is disrupted. We show that ER-microtubule tethering is  
22 tightly regulated by catalytic activity of TAOK2 in both interphase and mitotic cells,  
23 perturbation of which leads to profound defects in ER morphology and cell division. Our  
24 study identifies TAOK2 as an ER-microtubule tether, and reveals a kinase-regulated  
25 mechanism for control of ER dynamics critical for cell growth and division.

26

## 27 INTRODUCTION

28 The endoplasmic reticulum is an expansive and complex membranous cellular  
29 organelle. Composed of a continuous interconnected web of membrane sheets and  
30 tubules, the ER has distinct domains; namely the nuclear envelope, the rough ER sheets  
31 and smooth peripheral ER tubules (Voeltz et al., 2002). In addition, the ER makes  
32 specialized membrane contact sites with other organelles and the plasma membrane  
33 (Scorrano et al., 2019; Wu et al., 2018). Each of these domains are thought to be  
34 structurally discrete regions of the ER serving specialized physiological functions. This  
35 vast network of ER membranes relies on the microtubule cytoskeleton not only for  
36 structurally supporting its intricate shape and functional domains, but also for its motility  
37 and remodeling in response to stimuli. In animal cells, ER tubules align along  
38 microtubules (Terasaki et al., 1986). Disruption of microtubules by depolymerization  
39 agent nocodazole collapses the reticulated ER network into primarily ER sheets around  
40 the nucleus (Terasaki and Reese, 1994). In addition to its structural dependence,  
41 movement of ER membrane tubules occurs on microtubule tracks. Stabilization of  
42 microtubules by the drug taxol prevents new microtubule growth, and also inhibits ER  
43 tubule extension (Terasaki and Reese, 1994). Motor mediated ER 'sliding' movement  
44 occurs on stable acetylated microtubules (Friedman et al., 2010). Motor independent ER  
45 tubule extension along growing microtubule plus-ends is also dependent on  
46 microtubules, and is carried out by the 'tip attachment complex' composed of ER protein  
47 Stim1 and microtubule plus-end protein EB1 (Waterman-Storer and Salmon, 1998).  
48 Additionally, membrane contact sites between ER and organelles appear to be  
49 supported by microtubules. For example, ER-mitochondria contact sites are  
50 preferentially aligned with acetylated microtubules (Friedman et al., 2010). Endosome  
51 maturation occurs at junctions where ER-endosome contact sites and microtubules  
52 converge (Wu and Voeltz, 2021). Store-operated calcium entry occurs through the



53 Stim1-Orai channels at ER-plasma membrane contact sites (Grigoriev et al., 2008).  
54 Stim1 interaction with microtubules plays a facilitative role in organizing Stim1 for optimal  
55 Ca<sup>2+</sup> sensing through its interaction with Orai channels (Smyth et al., 2007). In  
56 geometrically complex cells such as neurons, the ER is dependent on microtubules for  
57 its distribution throughout the fine processes such as dendrites, dendritic spines and  
58 axons. Presence of fine caliber ER tubules in axons is critical for neuronal polarity, and  
59 is dependent on ER membrane interactions with microtubules (Farías et al., 2019). On  
60 the other hand, unlike elongated ER in axons and dendrites, which is closely associated  
61 with microtubules, ER organization at dendritic branch points and dendritic spines is  
62 structurally complex and exhibits decreased microtubule association (Cui-Wang et al.,  
63 2012). Bidirectional regulation of ER-microtubule tethering, therefore not only influences  
64 ER morphology but can also dictate cell shape and function.

65 Identity of molecular tethers that mediate ER-microtubule coupling, and  
66 mechanisms through which tethering is physiologically regulated are not well  
67 understood. Studying ER-microtubule association and its feedback control is  
68 challenging, owing to the considerably expansive morphology of the ER, one that  
69 exhibits extreme overlap with the microtubule cytoskeleton. The nanoscale organization  
70 of sites at which ER is coupled with microtubules and its molecular composition is  
71 unclear. Constantly in flux, ER membranes undergo a range of dynamic and structural  
72 changes including membrane extension, retraction, three-way junction formation and  
73 tubule fusion (Pandin et al., 2011) . Cell division brings about extensive ER remodeling,  
74 causing the ER membranes to coalesce around the spindle poles, but remain largely  
75 absent from the mitotic microtubule spindle at metaphase (Jongsma et al., 2015);  
76 (Smyth et al., 2015). Before insight into ER-microtubule dynamics and its physiological  
77 regulation can be gained, the mechanisms through which molecular tethers drive ER-  
78 microtubule association must be understood. Here, we investigate ER-microtubule

79 association in interphase and mitotic human cells, and identify TAOK2 as an ER-  
80 localized multifunctional protein kinase that serves as a molecular tether linking ER to  
81 microtubules. An ER-microtubule tether should in principle be ER localized and be  
82 capable of direct and strong binding to microtubules. The tether would likely be under  
83 physiological regulation such that ER-microtubule binding can not only be ectopically  
84 induced, but also importantly turned off. Loss of molecular tether should disrupt ER  
85 association with microtubules. Our study demonstrates that the kinase TAOK2 meets all  
86 the above criteria of a *bona fide* ER-microtubule tethering molecule.

87       Thousand And One amino acid (TAO) kinases are ubiquitously expressed  
88 serine/threonine protein kinases belonging to the Ste20 kinase family (Chen et al., 1999;  
89 Manning et al., 2002). While there is only one *Tao* kinase encoding gene in  
90 invertebrates, three distinct *TAOK* genes are expressed in human (Chen et al., 2003;  
91 Manning et al., 2002). The encoded kinases TAOK1, TAOK2 and TAOK3 share a highly  
92 conserved N-terminal kinase domain, followed by distinct C-terminal domains (Chen et  
93 al., 2003; Manning et al., 2002). TAO kinases were originally identified as stress-  
94 sensitive kinases that activate the p38 kinase cascades through activation of MEK  
95 kinases (Chen et al., 1999). Among the TAO family of protein kinases, TAOK2  
96 coordinates several aspects of neuronal development and function. TAOK2 is highly  
97 expressed during neuronal development and is important for basal dendrite formation as  
98 well as for axon elongation in cortical neurons (de Anda et al., 2012). TAOK2 is  
99 enriched in dendritic spines and is essential for their formation and stability (de Anda et  
100 al., 2012; Ultanir et al., 2014; Yadav et al., 2017). TAOK2 knockout mice exhibit  
101 cognitive and social-behavioral deficits, and show structural changes in brain size  
102 (Richter et al., 2018). Recently, mutations in TAOK2 have been associated with autism  
103 spectrum disorder, with several mutations present outside the kinase domain of the  
104 protein (Richter et al., 2018). Despite its clear relevance to human development and its

105 disease association, little is known about the molecular and cellular functions of TAOK2  
106 kinase.

107 In our study, we demonstrate that TAOK2 is a pleiotropic protein, with distinct  
108 catalytic kinase and ER-microtubule tethering functions, mediated through defined and  
109 dissociable domains. TAOK2 is enriched at junctions where the ER membrane makes  
110 contacts with the microtubule cytoskeleton. We show that TAOK2 is embedded in the  
111 ER membrane through transmembrane helices, and an amphipathic region that limits its  
112 localization to discrete subdomains of the ER. The cytoplasm facing ER-anchored C-  
113 terminal tail of TAOK2 directly binds microtubules with high specificity, and is essential  
114 for tethering of the ER membranes to microtubules. The ER and microtubule binding  
115 domains together, a remarkably small region of 100 residues, are sufficient for inducing  
116 ectopic tethering of ER to microtubules. Aberrant tethering by this minimal tether  
117 abolishes ER dynamics and mitotic ER remodeling. Importantly, we show that the  
118 tethering function of TAOK2 is negatively regulated by its kinase activity. During mitosis,  
119 we find that TAOK2 is highly activated, and inhibition of its catalytic function prevents ER  
120 disengagement from the mitotic spindle causing profound mitotic defects. This study  
121 identifies TAOK2 as an ER protein kinase and elucidates a hitherto unknown  
122 autoregulated mechanism for ER-microtubule tethering important for ER dynamics and  
123 mitotic segregation.

124

## 125 **RESULTS**

### 126 **TAOK2 is a multi-transmembrane protein kinase that resides on the endoplasmic** 127 **reticulum**

128 To investigate the unique role that non-kinase domains of TAO family members might  
129 impart on their biological function, we performed bioinformatic analysis of secondary  
130 protein structure of TAO kinases. We found that TAOK2 $\alpha$  (hereafter TAOK2) harbors

131 unique hydrophobic regions in its C-terminal domain not present in its alternatively  
132 spliced isoform TAOK2 $\beta$  or paralogous genes TAOK1 and TAOK3. Sequence analysis  
133 of TAOK2 through the transmembrane helix prediction software TMHMM2.0 (Krogh et  
134 al., 2001) indicates that TAOK2 is a multipass membrane protein containing four  
135 transmembrane helices (Figures 1A and 1B). Additional predicted region of  
136 hydrophobicity following the fourth transmembrane domain was analyzed using  
137 AMPHIPASEEK (Combet et al., 2000) and HeliQuest (Gautier et al., 2008). This analysis  
138 revealed an amphipathic helical (AH) region with a sharply defined hydrophobic face  
139 (hydrophobicity  $\langle H \rangle = 0.75$ , hydrophobic moment  $\langle m_M \rangle = 0.4$ ) and a polar face rich in  
140 positively charged residues (net charge  $z = 4$ ) (Figure 1A inset).

141 To determine the cellular localization of the membrane spanning TAOK2 kinase,  
142 we generated a rabbit polyclonal antibody against the unique C-terminal tail (residues  
143 1220-1235) of TAOK2 $\alpha$  (Figure 1B). Antibody staining in HEK293T cells revealed that  
144 endogenous TAOK2 colocalized extensively with the ER protein calreticulin, as well as  
145 with the expressed ER marker EGFP-Sec22b (Figures S1A and S1B). We noted that  
146 TAOK2 exhibited a striking localization on subdomains of the ER membrane in distinct  
147 punctate pattern. Therefore, we generated a GFP-tagged TAOK2 construct and  
148 performed super resolution microscopy (super-resolution by optical reassignment using  
149 SoRa disk) to visualize the ER localization of TAOK2 at higher resolution (Figure 1C).  
150 GFP-TAOK2 localized on the ER membrane and was present in discrete membrane  
151 subdomains (Supplementary Movie 1). To test biochemically whether TAOK2 is an ER  
152 membrane protein, we fractionated HEK293T cell homogenates into ER membrane  
153 fraction using differential centrifugation (Hoyer et al., 2018). TAOK2 was enriched in the  
154 ER membrane fraction along with other known ER membrane proteins such as Stim1  
155 (Grigoriev et al., 2008) and Rtn3a (Hu et al., 2009). 97.6% of the total TAOK2 in the

156 postnuclear homogenate was enriched in the ER fraction, as compared to 6.17% of  
157 tubulin (Figure 1D). On differential centrifugation, TAOK2 partitioned in the membrane  
158 fraction but not the cytoplasmic fraction, and treatment with detergent led to its release in  
159 the supernatant (Figure 1E). To identify the mechanism through which TAOK2 achieves  
160 its ER localization, we generated four GFP-tagged deletion constructs (Figure 1F).  
161 Deletion construct lacking the transmembrane and amphipathic helices (1-622) was  
162 entirely cytosolic, while the four transmembrane helices alone (941-1066) were sufficient  
163 to target the kinase to the ER. A GFP-construct containing just the TAOK2  
164 transmembrane domains localized uniformly throughout the ER, and was not restricted  
165 to ER subdomains. We found that the predicted amphipathic helical region together with  
166 the transmembrane domains (941-1162) is required for localization of TAOK2 to discrete  
167 ER subdomains, and captures the localization patterns of the endogenous TAOK2 protein  
168 (Figure 1F). Therefore, using superresolution microscopy and biochemical assays, we  
169 show that TAOK2 is an ER resident protein kinase. Further, our data show that TAOK2  
170 associates with the ER through its four transmembrane, while the amphipathic helices  
171 confer its localization to distinct punctate ER subdomains.

172

### 173 **TAOK2 associates directly with assembled microtubules via its conserved C-** 174 **terminal tail**

175 TAOK2 has previously been shown to colocalize with microtubules (Mitsopoulos et al.,  
176 2003), however mechanism underlying this observation is unknown. We found that  
177 overexpression of the C-terminal TAOK2 constructs led to bundling of microtubules, and  
178 these bundles were extensively decorated with GFP-TAOK2 constructs (Figure 2A and  
179 2B). Expression of C-terminal GFP-tagged deletion constructs allowed us to map the  
180 microtubule-binding domain to 40 amino acids (1196-1235) in the extreme C-terminal tail  
181 of TAOK2 (Figure 2C). We next tested whether TAOK2 can bind microtubules directly

182 using a biochemical binding assay with purified components. We bacterially purified GST  
183 tagged TAOK2 C-terminal tail protein (residues 1187-1235) (Figure S2A). An *in vitro*  
184 microtubule binding assay was used to test whether purified GST-TAOK2-C could bind  
185 microtubules polymerized from purified tubulin protein. GST-TAOK2-C pelleted  
186 specifically with polymerized MTs on centrifugation, while the control GST protein  
187 remained in the supernatant (Figure 2D and 2E), suggesting TAOK2 can directly  
188 associate with microtubules via its C-terminal tail. Further, the affinity of the TAOK2-  
189 microtubules interaction was assessed by determining the fraction of microtubule bound  
190 TAOK2-C at increasing concentration of tubulin. We found that the C terminal tail of  
191 TAOK2 associates with microtubules with a  $K_D$  of  $0.67 \pm 0.19 \mu\text{M}$  (Figure 2F and 2G).  
192 These results show that TAOK2 can directly bind microtubules through its cytoplasm  
193 facing C-terminal tail.

194

### 195 **ER membrane tethering to the microtubule cytoskeleton is mediated by TAOK2**

196 Our finding that TAOK2 is an ER kinase with the ability to directly bind microtubules led  
197 us to hypothesize that this enzyme can act as a molecular tether linking the ER  
198 membrane to microtubules (Figure 3A). To evaluate this possibility, we performed live  
199 cell imaging with simultaneous visualization of the ER membrane and microtubule  
200 cytoskeleton. Cells transfected with full length GFP-TAOK2 and ER-mRFP were  
201 incubated with a cell permeable microtubule binding dye, and three color time-lapse  
202 confocal microscopy was performed (Supplementary Movie 2). Indeed, 87% of GFP-  
203 TAOK2 punctae localized at the points of contact between the ER and the microtubule  
204 cytoskeleton (Figure 3A-3C). These punctae tracked with the movement of the ER  
205 membrane on microtubules (Supplementary Movie 2). In order to ascertain the domains  
206 within TAOK2 that conferred the tethering function of TAOK2, we generated several  
207 constructs that retained the ER localization and microtubule binding elements. The first

208 included the transmembrane domain (TMD), the amphipathic helix (AH) and microtubule  
209 binding domain, but lacked the N-terminal kinase and coiled coil domains (Figure 3D, top  
210 row). We found that expression of this construct led to aberrant over-tethering perturbing  
211 ER morphology, such that the ER appeared bundled alongside perinuclear microtubule  
212 cables. Next, we expressed a minimal-tether construct containing just the AH linked to  
213 the microtubule binding domain (1146-1235). Expression of the ‘mini-tether’ led to a  
214 complete collapse of the ER on to the microtubule cytoskeleton, where the ER  
215 membrane was entirely conformed to the shape of the microtubule cytoskeleton (Figure  
216 3D, center row). Live imaging revealed that aberrant tethering induced by the minimal-  
217 tether abolishes ER membrane dynamics due to its collapse on microtubules  
218 (Supplementary Movie 3). As anticipated, the TMD and the AH domain without the  
219 microtubule binding domain failed to induce tethering, and the ER retained its lace-like  
220 morphology occupying the entire cell area (Figure 3D, bottom row). These data together  
221 define the mechanisms through which TAOK2 mediates its tethering function, and  
222 delineate the minimal elements comprising the ER-microtubule tether. Importantly, these  
223 findings also imply that additional domains of TAOK2 outside the tethering elements  
224 regulate the coupling dynamics of the ER to the microtubule cytoskeleton.

225

## 226 **TAOK2 is required for ER microtubule plus end motility but not motor mediated** 227 **movement**

228 The ER membranes utilize the microtubule cytoskeleton as tracks for  
229 movement<sup>13-15</sup>. Distinct mechanisms of ER motility have been defined; ‘sliding’  
230 movements are kinesin-based rapid movement, and ‘tip-attachment complex’  
231 movements occur when the ER attaches to the MT plus ends and tracks along the  
232 growing MT (Friedman et al., 2010; Waterman-Storer and Salmon, 1998). To determine  
233 the functional consequences of TAOK2 depletion on ER motility and ER-MT movement,

234 we generated two independent TAOK2 knockout (KO) HEK293T cell lines using  
235 CRISPR/Cas9 mediated gene editing. Genetic knockout and loss of protein was  
236 validated using genome sequencing and western blot respectively (Figure 4A, Figure  
237 S2B and S2C). Wildtype and TAOK2 KO cells were transfected with the ER marker  
238 EGFP-Sec22b and time-lapse confocal microscopy allowed us to visualize ER  
239 dynamics. To test whether loss of TAOK2 mediated tethering would impact overall  
240 motility of the ER membranes, we measured ER membrane movement over time. ER  
241 motility in TAOK2 KO cells was significantly increased compared to WT cells (Figure  
242 4B). Average normalized pixel differences over time allowed us to calculate the ER  
243 motility index which increased from  $0.287 \pm 0.012$  in WT cells to  $0.351 \pm 0.017$  ( $n=9$ ,  
244  $p=0.0098$ ) in TAOK2 KO cells (Figure 4C). To further investigate how absence of TAOK2  
245 mediated tethering might increase ER motility, we performed simultaneous confocal  
246 imaging of ER (EGFP-Sec22b) and microtubule end binding protein mCherry-EB3. We  
247 found that in WT cells both TAC movements on microtubule plus end, as well as sliding  
248 ER movements were observed, however, in TAOK2 KO cells almost all observed  
249 movements were mediated by sliding movements. Thus, loss of TAOK2 disrupts TAC  
250 movements (Figure 4D), while motor mediated ER sliding movements are maintained  
251 (Figure 4E). Next, we determined whether absence of TAOK2 would impact microtubule  
252 dynamics. We found that microtubule growth assessed by measuring EB3 velocity was  
253 slightly increased in TAOK2 KO cells (Figure 4F). Further, in TAOK2 knockout cells, EB3  
254 comet tracks were less directed exhibiting increased curvature and paused more  
255 frequently compared to control WT cells (Figure 4F-4G, Supplementary Movie 4). Thus,  
256 our analyses of the TAOK2 knockout reveal an important role of TAOK2 in regulating the  
257 dynamics of ER-microtubule based movement, and suggest that TAOK2 mediated ER-  
258 MT tethering is essential for the structure and dynamics of ER membranes.  
259



## 260 **Aberrant TAOK2 tethering disrupts ER restructuring during mitosis**

261           The endoplasmic reticulum undergoes dynamic restructuring during cell division  
262 (Carlton et al., 2020). During metaphase, as the mitotic spindle aligns the chromosomes  
263 at the metaphase plate, the ER is anchored at each end to the spindle poles but largely  
264 absent from chromosomes and the area between the spindle poles. Defects in ER  
265 clearance from the chromosomes and spindle elicit mitotic defects (Schlaitz et al., 2013).  
266 Given the extensive association of ER with MT during cell division, we investigated the  
267 role of TAOK2 in ER restructuring during mitosis. Immunofluorescence using the C-term  
268 TAOK2 antibody revealed that TAOK2 was present as discrete puncta throughout the  
269 ER, the spindle pole, and on the spindle MT during mitosis (Figure 5A). We performed  
270 superresolution confocal microscopy to visualize GFP-TAOK2 localization in mitotic  
271 cells. We found that GFP-TAOK2 was present in close apposition to the spindle poles at  
272 sites where the ER membranes converged. TAOK2 localized at discrete punctate sites  
273 throughout the curvilinear peripheral ER surrounding the mitotic cell, as well as at the  
274 points of contact between ER membrane and the mitotic spindle (Figure 5B, bottom  
275 row). To test, whether TAOK2 was important for ER structural remodeling during cell  
276 division, we imaged WT and TAOK2-KO HEK293T mitotic cells expressing EGFP-  
277 Sec22b and mCherry-EB3 to visualize ER membranes and mitotic spindle. WT cells  
278 exhibited the characteristic ER morphology showing accumulation at spindle poles and  
279 fenestrated curvilinear peripheral ER. In contrast, TAOK2-KO cells had an abnormal  
280 morphology with increased peripheral curvilinear ER membranes, and concomitant  
281 decrease in association with spindle poles (Figure 5C and 5D). To determine if this  
282 aberrant ER morphology affected cell division, we immunostained WT and TAOK2 KO  
283 cells with tubulin and DAPI. While 95.6% WT cells showed normal bipolar spindle, only  
284 44.8% KO cells had a normal bipolar spindle. KO mitotic cells displayed a chromosomal  
285 misalignment defect, where 39.3% KO cells had a bipolar spindle with misaligned

286 chromosomes, and 15.8% KO cells had multipolar spindle (Figure 5E). While loss of  
287 TAOK2 induced defects in ER association with mitotic spindle, we next queried what  
288 would be the consequence of unregulated over-tethering by TAOK2. Expression of the  
289 short TAOK2 lacking the N-terminal kinase and coiled coil domains, induced a dramatic  
290 collapse of the ER membranes on the mitotic spindle (Figure 5F). TAOK2 binding to  
291 microtubules created an extremely short and stable MT-ER bridge between the spindle  
292 poles, which we refer to as pseudomonopolar (90.5% mitotic cells). The chromosomes  
293 were displaced from the metaphase plate and instead formed a rosette around the ER-  
294 MT spindle (Figure 5F, top row). These cells failed to divide. Expression of the ‘mini-  
295 tether’ construct containing the AH and the microtubule binding domain, generated a  
296 similar phenotype of pseudomonopolar spindle (30.7% mitotic cells) where the ER  
297 remained attached to the microtubules. Additionally, cells expressing the minimal tether  
298 displayed aberrant spindles which did not appear to be focused on the spindle poles  
299 (61.5% mitotic cells). In all the cases, the chromosomes were displaced from the spindle  
300 and ER was tightly associated with the spindle microtubules. The number of normal  
301 bipolar cells decreased from 96.7% in cells expressing WT-TAOK2 to 1.96% and 3.93%  
302 in mitotic cells expressing the tether constructs TAOK2 (941-1235) and TAOK2 (1146-  
303 1235), respectively. However, expression of a TAOK2 construct lacking the microtubule  
304 binding domain TAOK2 (941-1162), had normal ER morphology during mitosis, and  
305 92.2% mitotic cells had a bipolar normal spindle (Figure 5F and 5G). These data  
306 collectively show that downregulation of TAOK2 mediated ER-MT tethering during cell  
307 division is required for the disengagement of ER from the mitotic spindle and its  
308 segregation into daughter cells.

309

310 **Catalytic autoregulation of TAOK2 mediated ER-MT coupling**

311           What might be the mechanism through which TAOK2 regulates its function as an  
312 ER-MT tether? We tested whether the kinase activity of TAOK2 regulates its microtubule  
313 association. First, we introduced a kinase-dead mutation within the catalytic domain of  
314 TAOK2 at residue K57A, which disrupts the autophosphorylation at the critical residue  
315 S181 in the activation loop (Moore et al., 2000), and hence the catalytic activity of  
316 TAOK2 (Figure 6A). Comparative analysis of cells expressing ER-mRFP along with  
317 either GFP tagged-TAOK2 WT or TAOK2-K57A revealed that loss of kinase activity  
318 increased the association of TAOK2 with microtubules (Figure 6B). Colocalization  
319 analysis of GFP positive TAOK2 puncta with tubulin showed that association with  
320 microtubules increased from  $87.86 \pm 2.17\%$  for TAOK2-WT to  $96.46 \pm 1.28\%$  for TAOK2-  
321 K57A (Figure 6C). To test if increased association with microtubules resulted in stronger  
322 ER-MT tethering, we measured ER motility in cells expressing kinase dead TAOK2-  
323 K57A and ER marker EGFP-Sec22b. A substantial decrease in ER membrane motility  
324 was found in cells expressing TAOK2-K57A as opposed to TAOK2-WT (Figure 6D and  
325 Supplementary Movies 5-6). The ER motility index calculated from mean normalized  
326 pixel differences over time, was found to decrease from  $0.28 \pm 0.006$  in TAOK2-WT to  
327  $0.23 \pm 0.01$  ( $n=10$ ,  $p=0.0029$ ) in K57-TAOK2 expressing cells (Figure 6E). Further, we  
328 found that TAOK2 kinase activity was important for microtubule growth rates determined  
329 by measuring EB3 comet velocity. EB3 velocity averaged at  $0.35 \mu\text{m/s}$  in TAOK2-WT  
330 expressing cells and was decreased significantly to  $0.17 \mu\text{m/s}$  in cells expressing kinase  
331 dead TAOK2 (Figure 6F and Supplementary movies 5-6). While directional persistence  
332 of MT growth was reduced, the frequency of MT comet pauses increased from 8.5% in  
333 control to 19.7% in K57A-TAOK2 expressing cells (Figure S3A and S3B). These data  
334 indicate that catalytic activity of TAOK2 regulates its ER-MT tethering function. While

335 TAOK2 kinase activity negatively regulates its association with microtubules, it positively  
336 regulates microtubule growth and dynamics.

337         Next, we assessed whether TAOK2 catalytic activity was regulated during  
338 mitosis, and found that TAOK2 was highly activated during mitosis. Immunostaining  
339 interphase and mitotic cells with phospho-S181 antibody revealed a 2-fold increase in  
340 mitotic cells compared to interphase (Figure 6G). Western blot analysis showed high  
341 ratio of pS181-TAOK2/TAOK2 in lysates from synchronized mitotic cells compared to  
342 asynchronous cell lysate (Figure 6H). Therefore, we tested if perturbation of TAOK2  
343 kinase activity would impact mitosis or ER segregation during cell cycle. We expressed  
344 either GFP tagged TAOK2-WT or TAOK2-K57A along with ER-mRFP, and then used a  
345 405nm-DNA dye and 673nm-MT dye to enable four-color imaging of TAOK2, ER  
346 membrane, chromosomes and mitotic MT spindle. We found that while in TAOK2-WT  
347 expressing cells, both TAOK2 and the ER membranes were enriched at the spindle  
348 poles, and a majority of the ER membrane was dissociated from the spindle  
349 microtubules. However, in cells expressing TAOK2-K57A kinase dead mutant, TAOK2  
350 association with the spindle MT was markedly increased and ER membranes were  
351 extensively associated with the mitotic spindle MT (Figure 6I). A failure of ER  
352 membranes to disengage from the spindle MT led to severe mitotic defects including  
353 monopolar (22%), multipolar (15%) and aberrant spindles (21%). Accordingly, the  
354 number of mitotic cells exhibiting a normal bipolar spindle decreased from 92% in cells  
355 expressing TAOK2-WT to about 41% in TAOK2-K57A expressing cells (Figure 6J).  
356 These data demonstrate that the kinase activity of TAOK2 is important for dynamic  
357 regulation of ER-MT tethering during cell division, and perturbation of its catalytic activity  
358 leads to failure of ER segregation into daughter cells, ultimately inducing mitotic defects.

359

360 **DISCUSSION**

361 Our study identifies TAOK2 as an ER resident kinase that functions as a  
362 molecular tether linking the ER membranes to microtubule cytoskeleton. TAOK2 is a  
363 large multifunctional protein of 1235 amino acids (Chen et al., 1999). At the molecular  
364 level, we show that distinct structural domains within TAOK2 confer its catalytic activity,  
365 ER localization and microtubule association. Importantly, we demonstrate that, while the  
366 ER-microtubule tethering function of TAOK2 is structurally dissociated from its kinase  
367 domain, the catalytic activity of TAOK2 negatively regulates ER-microtubule tethering.  
368 Our results show that knockout of TAOK2 and kinase-dead TAOK2 expression have  
369 opposing effects on ER-microtubule tethering and dynamics in both interphase and  
370 mitotic cells. Thus, TAOK2 possesses the unique capacity to autoregulate ER-  
371 microtubule tethering through its kinase activity. We provide two key pieces of evidence  
372 in support of bidirectional autoregulation of tethering by TAOK2. First, we show that the  
373 kinase dead TAOK2 is a stronger ER-microtubule tether. Second, TAOK2 kinase activity  
374 is increased in mitosis, which correlates with a dramatic decrease in the tethering of ER  
375 membranes with the mitotic spindle microtubules. Perturbation of TAOK2 kinase activity  
376 in mitotic cells leads to failure in disengagement of ER from the spindle causing mitotic  
377 defects.

378

379 Little is known about upstream mechanisms that mediate TAOK2 activation.  
380 Early studies on the family of TAO kinases suggest that they might function as  
381 intermediate signaling kinases that link certain heterotrimeric G protein-coupled  
382 receptors to the p38 MAPK pathway. Among ligands that induce TAOK2 activation,  
383 nocodazole, sorbitol and the muscarinic agonist carbachol were found to increase  
384 TAOK2 activity from 1.5-3 fold on stimulation (Chen et al., 2003). Members of the TAO  
385 family can be activated by ATM kinase in response to genotoxic stress (Raman et al.,  
386 2007), however, whether TAOK2 is phosphorylated is unknown. TAOK2 is

387 phosphorylated by the Hippo kinase mammalian homolog MST3 at residue T468  
388 proximal to the kinase domain (Ultanir et al., 2014). Whether phosphorylation by MST3  
389 increases TAOK2 catalytic activity has not been demonstrated. Further, in neurons, the  
390 secreted semaphorin molecule Sema3a has been shown to increase TAOK2 kinase  
391 activity in neurons through interaction with its receptor Neuropilin 1 (de Anda et al.,  
392 2012). Therefore, several independent signaling pathways might impinge on TAOK2  
393 kinase to achieve distinct context-dependent cellular outcomes.

394

395         Our findings show that TAOK2 is a unique serine/threonine kinase, as no other  
396 multipass membrane serine/threonine kinase has been reported to date. Two other  
397 kinases with a single transmembrane domain reside in the ER membrane, Ire1(Cox et  
398 al., 1993; Mori et al., 1993) and PERK (Harding et al., 1999). Both Ire1 and PERK  
399 kinases have a cytosol facing kinase domain similar to TAOK2. The C-terminal tails of  
400 Ire1 and PERK project into the luminal domain where they have important functions  
401 associated with sensing ER stress (Ron and Walter, 2007). In contrast, the C-terminal  
402 tail of TAOK2 faces the cytoplasm and directly binds microtubules. The intrahelical loops  
403 between with the transmembrane helices are predicted to be extremely short (4-6 amino  
404 acids), and it is unlikely that TAOK2 serves a role as an ER stress sensor within the ER  
405 lumen. However, it is conceivable that TAOK2 is activated during ER stress indirectly  
406 through other ER stress sensors. Our data suggests that the punctate localization of  
407 TAOK2 within distinct ER subdomains is conferred by an amphipathic helical domain  
408 following the fourth transmembrane helix. Investigating the molecular identity of these  
409 ER subdomains in terms of its lipid and protein constituents would likely reveal important  
410 insight into TAOK2 regulation. Based on the findings of this study, we predict that  
411 increased activation in conditions of cellular stress might negatively regulate its function  
412 as an ER-MT tether, and will be an important area of future inquiry.

413 Identification of TAOK2 as a unique kinase that also functions as an ER-MT  
414 tether, adds to the short list of two other multifunctional ER enzymes, Spastin and  
415 Atlastin that bind microtubules. Hereditary spastic paraplegia protein, Spastin, is a  
416 microtubule severing AAA ATPase enzyme that localizes to the ER and remodels  
417 microtubules via its C terminus domain (Hazan et al., 1999; Roll-Mecak and Vale, 2008).  
418 The other is Atlastin, an ER localized GTPase required for ER tubule fusion (Orso et al.,  
419 2009). In addition to these enzymes, several other ER proteins associate with the  
420 microtubule cytoskeleton directly or indirectly, and are each likely to serve a particular  
421 physiological function through tethering (Wang et al., 2016). Perhaps the most well  
422 studied, Stim1, is an ER protein that interacts with microtubule growing tips indirectly by  
423 binding EB1 proteins (Grigoriev et al., 2008; Pavez et al., 2019). Climp63 is an ER  
424 protein thought to instruct the luminal width of ER sheets (Nikonov et al., 2007;  
425 Vedrenne et al., 2005) and can directly associate with microtubules (Klopfenstein et al.,  
426 1998). It is important to note, that unlike the abovementioned microtubule binding ER  
427 proteins, TAOK2 has the unique ability to bidirectionally autoregulate its microtubule  
428 association.

429

430 As a kinase highly expressed in neurons, and one critical for neurodevelopment,  
431 the role of TAOK2 as an autoregulated ER-MT tether is likely to serve specific  
432 physiological functions in neurons. Neuronal development, connectivity and plasticity are  
433 dependent on the presence of ER membranes within fine neuronal processes such as  
434 spines, axons and dendrites where they are transported along and tethered to  
435 microtubules. TAOK2 is critical for dendritic spine development (Ultanir et al., 2014;  
436 Yadav et al., 2017), axon elongation and basal dendrite branching (de Anda et al., 2012;  
437 Richter et al., 2018). TAOK2 knockout mouse models exhibit cognitive and social-  
438 behavioral deficits, and show structural changes in brain size (Richter et al., 2018),



439 mechanisms of which are unknown. Further, de novo mutations in TAOK2 have been  
440 found through whole-genome and exome sequencing of patients with autism spectrum  
441 disorder (Richter et al., 2018). Our findings provide a hitherto unknown mechanism for  
442 kinase mediated control of ER tethering to microtubule cytoskeleton. Elucidating TAOK2  
443 function in specialized cells types such as neurons that respond to physiological stimuli  
444 by remodeling ER-microtubules tethering is likely to expand on our current  
445 understanding of the importance and dynamics of communication between cellular  
446 organelles and the cytoskeleton.

447

## 448 **Acknowledgement**

449 We are grateful for research funding provided by National Institute of Mental Health, R00  
450 MH108648 and R01 MH121674 to SY, the Brain and Behavior Research Foundation's  
451 NARSAD Young Investigator Award (27818) to SY. KN was supported by the NIH pre-  
452 doctoral Pharmacological Sciences Training Program T32GM007750. We thank Dan  
453 Fong (Nikon) for technical assistance on the Nikon CSU-W1 SoRa superresolution  
454 microscope. We are grateful to Brian Beliveau (UW), Cole Trapnell (UW) and Jay  
455 Shendure (UW, HHMI) for use of their Nikon CSU-W1 SoRa superresolution microscope  
456 funded by HHMI. Thanks to John D. Scott (UW), Ning Zheng (UW, HHMI) and Shao-En  
457 Ong (UW) for comments and suggestions on the manuscript.

458

## 459 **Author contribution**

460 All experiments were designed, performed and analyzed by KN and SY, unless  
461 otherwise stated. AF generated and characterized the TAOK2 KO lines and cloned the  
462 GFP-TAOK2 construct. MB performed molecular biology experiments. Project funding  
463 obtained by SY. Manuscript written by KN and SY, and edited by all authors.



## 464 **Figure Legends**

465

466 **Figure 1. TAOK2 is an ER protein kinase that localizes to the ER membrane**

467 **through four transmembrane domains and an amphipathic helix**

468 (A) Transmembrane Hidden Markov Model (TMHMM v2.0) prediction plot shows the  
469 posterior probabilities (y axis) of inside/outside(magenta) / TM helix (red) along the  
470 length of TAOK2 sequence (x axis). Hydrophobic region following the 4<sup>th</sup> predicted TMD  
471 was analyzed through AMPHIPASEEK which predicted residues 1146-1162 to be  
472 amphipathic. Charged (blue) and hydrophobic (yellow) residues are indicated in the  
473 inset. HeliQuest was used to calculate hydrophobicity  $\langle H \rangle$ , hydrophobic moment  $\langle \mu H \rangle$   
474 and net charge  $z$ .

475 (B) Schematic representation of TAOK2 isoforms  $\alpha$ ,  $\beta$  and TAOK1. The coiled coils  
476 (CC), four transmembrane domains (TM) and amphipathic helix (AH) predicted in  
477 TAOK2 are depicted. The unique C-terminal tail region of TAOK2 marked by the asterisk  
478 indicates the epitope used to generate the TAOK2 $\alpha$  specific antibody.

479 (C) Super resolution (SoRa: super resolution by optical reassignment) images of  
480 HEK293T cells expressing GFP-TAOK2 (cyan) and ER marker ER-mRFP (red), zoomed  
481 in sections are depicted in yellow boxes. Scale bar bottom left is 5 $\mu$ m, and bottom right  
482 is 0.5 $\mu$ m.

483 (D) Western blot of cell homogenate fractionated into ER membrane and cytosol probed  
484 with antibodies against TAOK2, known ER membrane proteins Stim1 and Rtn3,  
485 mitochondrial protein Tom20 and tubulin.

486 (E) Western blot of cell homogenate fractionated into membrane pellet (P) and cytosolic  
487 supernatant (S) components, in the absence (control) or presence of detergent, probed  
488 with antibodies against TAOK2 and ER protein Rtn3a.

489 (F) Schematic shows the GFP-tagged TAOK2 deletion constructs used in Fig.1g.  
490 (G) Confocal images of HEK293T cells expressing distinct GFP-tagged TAOK2 deletion  
491 constructs (green) and ER-mRFP (magenta). Scale bar is 3 $\mu$ m.

492

493 **Figure 2. Direct binding of TAOK2 to microtubules through its C-terminal tail**

494 (A) Confocal images of HEK293T cells expressing the indicated GFP-tagged TAOK2  
495 construct immunostained for  $\alpha$ -tubulin. Scale bar is 3 $\mu$ m.

496 (B) Zoomed in images showing the overlap of GFP-tagged TAOK2 with microtubules  
497 immunostained for  $\alpha$ -tubulin. Scale bar is 1 $\mu$ m. RGB profile of fluorescence intensity  
498 peaks of TAOK2 (green) and  $\alpha$  tubulin (red).

499 (C) Schematic representation of GFP-tagged deletion constructs used to map the  
500 microtubule binding domain. Coiled coil (CC), transmembrane (TMD); amphipathic helix  
501 (AH) domains are marked. Observed microtubule localization is indicated accordingly in  
502 the checkbox.

503 (D) Coomassie stained SDS-page gel shows co-sedimentation of indicated proteins with  
504 polymerized tubulin. Microtubule binding assay was performed with 5 $\mu$ g of GST or GST-  
505 TAOK2-C (1187-1235) protein in the presence of taxol polymerized microtubules.  
506 Binding is assessed by the fraction of protein pelleted with microtubules (P) while  
507 unbound protein is in supernatant (S).

508 (E) Percent protein bound to microtubules is plotted for each protein as indicated. Error  
509 bars indicate standard error of mean, n=3, p<0.0001, one-way ANOVA.

510 (F) Coomassie stained SDS-page gel shows the amount of purified GST-TAOK2-(1187-  
511 1235) unbound (S) or co-sedimented with polymerized microtubules (P) with increasing  
512 concentrations of tubulin as indicated.

513 (G) Strength of microtubule association was determined from dissociation constant  $K_D$   
514 derived by Michaelis-Menten equation. Error bars indicate standard error of mean,  $n=3$   
515 replicates.

516

### 517 **Figure 3. TAOK2 is an ER-microtubule tethering protein kinase**

518 (A) TAOK2 (green) schematically depicted as a multipass transmembrane protein on the  
519 ER (grey) has an N-terminal cytoplasm facing kinase domain and a C-terminal tail that  
520 directly binds microtubules (magenta). Confocal images of HEK293T cells expressing  
521 GFP-TAOK2 (yellow), ER-mRFP (magenta) and live-stained with microtubule dye  
522 (cyan). Scale bar is  $3\mu\text{m}$ .

523 (B) Montage of confocal time lapse images shows TAOK2 (yellow) punctae colocalized  
524 with both ER membrane (magenta) and microtubules (cyan). Scale bar is  $1\mu\text{m}$ .

525 (C) Percent TAOK2 puncta colocalized with ER and microtubules is plotted. Values  
526 indicate mean,  $n=10$  cells and error bars indicate S.E.M.

527 (D) Schematic on the left depicts topology of TAOK2 deletion constructs corresponding  
528 to representative confocal images of HEK293T cells expressing the indicated TAOK2  
529 construct (yellow), ER-mRFP (magenta) and microtubules (cyan). Scale bar is  $5\mu\text{m}$ .

530

### 531 **Figure 4. TAOK2 knockout disrupts ER-microtubule dynamics**

532 (A) Western blot of lysate from wildtype and TAOK2 (knock out) KO cells generated  
533 using CRISPR/Cas9 mediated gene editing. Guide RNA sequences used for the  
534 knockout are shown.

535 (B) Confocal images of peripheral ER in wildtype and TAOK2 KO cells expressing ER  
536 marker EGFP-Sec22b at a single time point (left column). Sum slice projection of  
537 cumulative pixel difference in successive frames over 30s time period (right), where

538 images were acquired every 3sec. Fluorescence intensity is pseudocolor coded, red  
539 regions representing increased ER motility. Scale bar is 3 $\mu$ m.

540 (C) ER motility index calculated by averaging the normalized pixel difference between  
541 successive time frame over 30s is plotted for wildtype and TAOK2 KO cells. Error bars  
542 indicate S.E.M, n=9 cells, t-test.

543 (D) Montage of images acquired every 2s, of wildtype and TAOK2 KO cells expressing  
544 EGFP-Sec22b and mCherry-EB3 shows movement of ER membranes (cyan) associated  
545 with microtubule plus tips (red) in wildtype but not KO cells.

546 (E) Time lapse confocal images of cells expressing EGFP-Sec22b and mCherry-EB3  
547 were analyzed and ER membrane movements classified into slow MT plus tip  
548 associated-TAC (colocalized with EB3 comet) and fast motor driven sliding movements  
549 (lacking association with EB3 comets). Percent MT plus tip associated (TAC) events and  
550 sliding events is shown for WT and TAOK2 KO cells. Mean values are plotted, n=5 cells  
551 for each condition.

552 (F) Microtubule directional persistence, calculated as a fraction of perpendicular distance  
553 between start/end points and the length of the actual path taken is plotted for wildtype  
554 and TAOK2 knockout cells. Values indicate mean  $\pm$  S.E.M., n=9 cells with at least 5  
555 comet paths measured per cell, two tailed t-test.

556 (G) Percent total time spent by EB3 comet pausing (no growth) is plotted for wildtype  
557 and TAOK2 KO cells. Values indicate mean  $\pm$  S.E.M., n=9 cells with at least 5 comet  
558 paths measured per cell, two tailed t-test.

559 (H) EB3 comet tracks generated using the Manual tracking function in Fiji were used to  
560 measure EB3 comet velocity by dividing the total distance traveled over time. Mean  
561 values for wildtype and TAOK2 KO cells are plotted, error bars indicate S.E.M, n=9 cells  
562 with 5 comets per cell, two tailed t-test.

563

564 **Figure 5. TAOK2 localizes to the mitotic spindle and regulates mitotic ER**  
565 **remodeling**

566 (A) TAOK2 antibody staining shows localization of endogenous TAOK2 (yellow) on the  
567 ER (cyan) and mitotic spindle microtubules (red) in mitotic cells.

568 (B) Superresolution confocal image of mitotic cell expressing GFP-TAOK2 (yellow) and  
569 ER-mRFP (blue) and stained with microtubule dye (magenta), scale bar is 2 $\mu$ m (top  
570 right). Magnified view of the ER-MT tethering sites on the spindle is shown in the bottom  
571 row, scale bar is 0.5 $\mu$ m.

572 (C) Confocal live cell images of WT and TAOK2 KO mitotic cells expressing EGFP-  
573 Sec22b (green) and mCherry-EB3 (magenta). Dashed white line drawn across the  
574 spindle poles highlights the difference in spindle pole associated ER fraction in WT and  
575 TAOK2 KO cells. Scale bar is 5 $\mu$ m.

576 (D) ER distribution in mitotic cells is measured using Azimuthal Average of normalized  
577 fluorescence intensity in each hemisphere demarcated by the mitotic spindle (where 0  
578 and 180 correspond to the spindle poles) is plotted for WT (gray) and TAOK2 KO  
579 (orange) cells. Average means are plotted, error bars are S.E.M., and n=3 cells.

580 (E) Percent mitotic WT (grey) and TAOK2 KO (orange) cells that exhibit bipolar,  
581 multipolar or misaligned mitotic spindles are plotted. Values indicate mean  $\pm$  S.E.M.,  
582 n>45 mitotic cells from three different experiments, p<0.0001 one-way ANOVA.

583 (F) Schematic (left) depicts topology of GFP-TAOK2 deletion constructs. Corresponding  
584 confocal images of mitotic HEK293T cells expressing the indicated TAOK2 construct  
585 (yellow), ER-mRFP (magenta), DNA (blue) and microtubules (cyan) are shown. Scale  
586 bar is 5 $\mu$ m.

587 (G) Mitotic defects in cells expressing the indicated TAOK2 constructs is depicted as the  
588 percent of mitotic cells exhibiting normal bipolar or aberrant spindles. Values indicate  
589 mean  $\pm$  S.E.M., n=52 cells from 3 different experiments.

590

591 **Figure 6. ER-microtubule tethering is regulated by catalytic activity of TAOK2**

592 (A) Catalytic activity of GFP-TAOK2 WT and GFP-TAOK2 K57A was measured in an *in*  
593 *vitro* kinase reaction using autophosphorylation at S181 as the readout. Western blot  
594 probed with phospho-S181 antibody to measure kinase activity and anti-GFP represent  
595 the total amount of TAOK2.

596 (B) Confocal images of cells expressing GFP-TAOK2 WT and GFP-TAOK2 K57A  
597 (yellow) along with ER-mRFP (blue) and live-stained with microtubule dye (red). Scale  
598 bar is 5 $\mu$ m.

599 (C) Percent of GFP-TAOK2 WT and GFP-TAOK2 K57A puncta colocalized with  
600 microtubules is plotted. Values indicate mean, n=10 cells, error bars indicate S.E.M.,  
601 p<0.005, two tailed t-test.

602 (D) Confocal images of peripheral ER in cells expressing TAOK2 WT or TAOK2 K57A  
603 along with ER marker EGFP-Sec22b at a single time point (left column). Sum slice  
604 projection of cumulative pixel difference in successive frames over 30s, where images  
605 were acquired every 3s are shown. Fluorescence intensity is pseudocolor coded, red  
606 regions representing increased ER motility. Scale bar is 3 $\mu$ m.

607 (E) ER motility index is calculated by averaging the normalized pixel difference between  
608 successive time frame over 30s. Mean ER motility for TAOK2 WT and TAOK2 K57A  
609 expressing cells is plotted. Error bars indicate S.E.M, n=10 cells, two tailed t-test.

610 (F) Montage of images acquired every 2s of cells expressing TAOK2-WT or TAOK2  
611 K57A along with mCherry-EB3 shows movement of EB3 comets (cyan) over time on y  
612 axis. Scale bar is 1 $\mu$ m.

613 (G) EB3 comet tracks generated using the Manual Tracking function in Fiji were used to  
614 measure EB3 comet velocity by dividing the total distance travelled over time. Mean  
615 velocity values for cells expressing mCherry-EB3 along with either TAOK2 WT or  
616 TAOK2 K57A are plotted. Error bars indicate S.E.M, n=10 cells, two tailed t-test.

617 (H) Confocal images of mitotic and interphase HEK293T cells stained with phospho-  
618 S181 and tubulin antibodies to label active TAOK2 and microtubules respectively. DNA  
619 stained with DAPI.

620 (I) Average intensity of phospho-S181 staining in mitotic cells normalized by average  
621 interphase intensity is plotted. Error bars indicate S.E.M, n=10 cells, t-test with Welch  
622 correction.

623 (J) Confocal images of mitotic cells expressing GFP-TAOK2 WT or GFP-TAOK2 K57A  
624 (yellow) along with ER-mRFP (cyan) was stained with DNA dye (blue) and microtubules  
625 dye (red). Scale bar is 5 $\mu$ m.

626 (K) Mitotic defects in cells expressing GFP-TAOK2 WT or GFP-TAOK2 K57A are plotted  
627 as the percent of mitotic cells exhibiting normal bipolar or aberrant spindles. Values  
628 indicate mean  $\pm$  S.E.M., n=50 cells from 3 different experiments.

629 (L) Schematic representation of functional roles of TAOK2 in maintaining ER structure  
630 and its remodeling during mitosis. Distinct effects of TAOK2 depletion (TAOK2 knockout)  
631 compared to those due to kinase dysfunction (TAOK2 kinase dead) in interphase and  
632 mitotic cells are shown. The divergent effects of TAOK2 kinase dead mutation and  
633 TAOK2 knockout suggest pleiotropic roles of TAOK2 mediated by functional domains in  
634 addition to its kinase domain.

## 635 **Methods**

### 636 **Antibodies and Plasmids**

637 Antibodies used in this study are as follows: alpha-Tubulin (Mouse, Sigma, T9026-  
638 100UL), GAPDH (Mouse, Invitrogen, MA5-151738), Calreticulin (Mouse, Abcam,  
639 ab22683), TAOK2, Rabbit, Sigma, HPA010650), Rtn3a (Rabbit, ProteinTech, 12055-2-  
640 AP), Acetylated alpha Tubulin (Mouse, Sigma, T6793), GST (Mouse, Invitrogen),  
641 GM130 (Mouse, BD Labs, 610822), TAOK2-Cterm (Rabbit), Tom20 (Mouse, Santa Cruz  
642 Biotech, sc-17764), Stim1 (Mouse, Santa Cruz Biotech, sc-166840), GFP (Mouse,  
643 Roche, 11 814 460 001), Phospho-TAO2 (S181) (Rabbit, R&D Systems,  
644 PPS037). Addgene Plasmids used in this study are as follows: mCh-Sec61 beta  
645 (#49155), sfGFP-C1 (#54579), ER-mRFP (#62236), EGFP-Sec22b (#101918).

### 646 **Molecular Cloning and CRISPR/Cas9 genome editing**

647 Full length human TAOK2 was PCR amplified from pCMV-Sp6-TAOK2 plasmid  
648 described previously (Ultanir et al., 2014), and inserted in vector sfGFP-C1 (Addgene  
649 #54579) using restriction sites HindIII and MfeI. Domain dissection mutants were  
650 subcloned from sfGFP-TAOK2 using restriction enzymes HindIII and MfeI (New England  
651 Biolabs). All resultant plasmids were verified by sequencing. GST-TAOK2-(1187-1235)  
652 was subcloned from the sfGFP-TAOK2 into the pGEX4T1 vector using sites Sall and  
653 NotI. TAOK2 knockout cell line was generated using CRISPR/Cas9 genome editing in  
654 HEK293T cells. Four independent guides were designed using Synthego guide design  
655 tool (<https://www.synthego.com>) to target coding exon 2. Two plasmids were made by  
656 adding their respective guides into CrisprV2pSpCas9(BB)-2A-Puro (PX459) V2.0  
657 (Addgene Plasmid #62988). Cells were passaged in single cell suspension and plated at  
658 50% confluence. Cultures were then transfected with lipofectamine 2000 reagent  
659 (Invitrogen 11668-030) and 2mg of each respective plasmid. Non-Homology End Joining



660 (NHEJ) repair created a deletion around the gRNA cutting site. Cells were selected with  
661 Puromycin for 2 days. Genomic DNA was extracted and the region around the cutting  
662 site was PCR amplified. Knockout of the gene *TAOK2* was confirmed by Sanger  
663 sequencing analysis, and absence of encoded protein was validated using western blot.

#### 664 **Cell Culture and Maintenance**

665 All experiments were performed in HEK293T cells, which were grown in DMEM media  
666 (Thermo Fisher, Gibco) with 10% fetal bovine serum (Axenia BioLogix) and 1% Pen-  
667 Strep (Invitrogen). Cells were maintained at 5% CO<sub>2</sub> and 37°C and passaged every 3-4  
668 days.

#### 669 **Immunofluorescence and Western Blotting**

670 Cells were fixed with 4% paraformaldehyde and 4% sucrose for 20 minutes at room  
671 temperature, followed by 3 washes with phosphate-buffered saline (PBS). One-hour  
672 incubation with blocking buffer (200mM Glycine pH 7.4, 0.25% TritonX-100, 10% Normal  
673 Donkey Serum, in PBS) was followed by overnight incubation with primary antibody at a  
674 1:1000 dilution in blocking buffer. After three 5min washes in PBS, cells were incubated  
675 with secondary antibody at 1:1000 dilution in blocking buffer for 3hr. Coverslips were  
676 washed and then mounted onto slides with FluoromontG. Endogenous *TAOK2* staining  
677 was performed similarly, except cells were fixed with cold methanol incubated on ice for  
678 20 minutes instead of PFA. Samples for western blot analysis were treated with 4X LDS  
679 Sample Buffer (Thermo Fisher) with 125 mM DTT and subsequently heated for 10  
680 minutes at 95C. Samples were electrophoresed on NuPAGE 4-12% Bis-Tris  
681 Polyacrylamide gels (Thermo Fisher) with NuPAGE MOPS running buffer (Thermo  
682 Fisher). Western blot transfer to ImmobilonP PVDF membrane (Millipore-Sigma) with  
683 Transfer Buffer (25mM Tris, 192mM Glycine, 20% (v/v) Methanol, 0.05% SDS) at 100V  
684 for 60min. Resultant blot was blocked in 5% milk or BSA blocking buffer, and subjected  
685 to primary antibody and HRP conjugated secondary antibody before visualization with

686 Pierce™ ECL Western Blotting Substrate (Thermo Fisher). Western blot images were  
687 obtained using the ChemiDoc Imager (BioRad).

### 688 **Image Analysis and quantification**

689 MT growth analysis was performed using the ImageJ plugin for manually tracking  
690 objects (Manual Tracking). Single frame time lapse image stacks were processed to  
691 measure the distance traveled by EB3 comets in each frame. Velocity was calculated by  
692 dividing the total distance traveled by the time taken. Curvature was calculated by  
693 dividing the minimum linear path (from beginning to end) by the length of the actual  
694 distance the EB3 comet traveled. Time paused was calculated by measuring the number  
695 of times the EB3 comet did not change coordinates multiplied by time between each  
696 frame (2s). Percent time paused is calculated by divided by the total time the comet was  
697 tracked.

698 ER motility was measured from single-z frame image stacks acquired from  
699 imaging the ER markers (EGFP-Sec22 or ER-mRFP) using ImageJ. Substacks were  
700 created corresponding to frames 6s apart and pixel differences every 6s were calculated  
701 using the Stack Difference function to determine a change in fluorescence ( $\Delta F$ ).  $\Delta F$  was  
702 then divided by the mean fluorescence ( $F$ ) of the earliest time point frame from which it  
703 was derived. (i.e.,  $\Delta F$  between frames 3 and 4 would be divided by frame 3) These  $\Delta F/F$   
704 values were taken for each time point and averaged over 2 minutes to determine ER  
705 motility for each cell. To obtain the cumulative pixel difference the substack obtained  
706 from using the Stack Difference function was z-projected with the 'sum slices' option,  
707 and then pseudocolored using the physics LUT. This method to calculate ER motility  
708 index is an adaptation from Dong et al. (2018) (Dong et al., 2018) with specified  
709 changes.

710 To assess mitotic defects, four color images were acquired as z-stacks with  
711 0.3micron spacing such that the entire mitotic cell was captured. Mitotic defects were

712 scored manually by visualizing the entire z stack, based on the spindle morphology, ER  
713 morphology and chromosomal localization.

#### 714 **Differential Centrifugation Assay**

715 HEK293T cells were grown to confluence in four 10cm dishes using DMEM media with  
716 10% fetal bovine serum and 1% Pen-Strep. Cells were washed once with Dulbecco's  
717 PBS, collected in ice cold PBS and pelleted by centrifugation at 200g. Pellet was  
718 resuspended in 2 mL of homogenization buffer (250mM sucrose, 10mM HEPES, 1mM  
719 EDTA, protease inhibitors (Roche), 1mM PMSF, and 1mM DTT) and homogenized with  
720 a 25-gauge syringe needle. Homogenate was subsequently spun at 800g to pellet  
721 nuclear fraction. Post nuclear supernatant (S1) was diluted in homogenization buffer to  
722 split between two 2mL ultracentrifuge tubes. Heavy membrane fraction (P2) was  
723 obtained by centrifuging S1 at 27,000g for 30 minutes at 4 °C. Light membrane fraction  
724 (P3) was obtained by centrifuging S2 at 100,00g for 30 minutes. P3 was resuspended in  
725 either 200uL: homogenization buffer (control), or detergent buffer (1% NP-40, 1%  
726 TritonX-100, 0.1% SDS) and incubated on ice for 30 minutes before spinning at  
727 200,000g for 60 minutes at 4 °C. Resultant high speed pellets (P4) were resuspended in  
728 4x sample buffer with 125mM DTT. Resultant supernatants S4 and cytosolic supernatant  
729 fraction S3 were precipitated with ice cold 10% trichloroacetic acid by incubating on ice  
730 for 15 minutes followed by centrifugation at 21,000g. Precipitates were washed with ice-  
731 cold acetone, and pelleted at 21,000g for 5 minutes and resuspended in 4x sample  
732 buffer with 125 mM DTT. All samples were run on SDS-PAGE gels and transferred to  
733 PVDF membrane for western blot analysis.

#### 734 **ER Membrane Isolation**

735 HEK293T cells were grown to confluence in four 10cm dishes. Cells were washed once  
736 with Dulbecco's PBS, collected in ice cold PBS and pelleted by centrifugation at 200g.  
737 Pellet was resuspended in 1mL of isolation buffer (225mM mannitol, 75mM sucrose,

738 30mM Tris-HCl pH 7.4, 0.1mM EGTA and protease inhibitors (Roche), and  
739 homogenized with a 25G needle at 4°C. The homogenate was subsequently subjected  
740 to a series of spins at 4°C, retaining the pellet from each and continuing with supernatant  
741 to the next spin. The centrifugation schema was as follows (adapted from Hoyer et al.  
742 2018): 2 spins at 600g for 5 minutes to pellet both cell debris and nuclei (P1 and P2), 3  
743 spins at 7000g for 5 minutes each to pellet mitochondria (P3, P4, and P5), and a  
744 20,000g spin for 20 minutes to pellet the crude ER fraction (P6). The supernatant from  
745 the last spin yielded the cytosol, and P6 was washed with isolation buffer devoid of  
746 EGTA and subject to a 20,000g spin for 15 minutes at 4°C to re-pellet. P1-6 were  
747 resuspended in resuspension buffer (50mM HEPES, 2.5mM MgCl<sub>2</sub>, 200mM KCl, 5%  
748 glycerol, 1% TritonX-100). Protein concentrations of resuspended P1-6 and cytosolic  
749 fraction were quantified by BCA assay, and subsequently 4X sample buffer with 0.125M  
750 DTT was added. This method of crude organellar separation was adapted from Hoyer et  
751 al., (2018) (Hoyer et al., 2018). Normalized samples were analyzed by western blot.

## 752 **Microscopy**

753 Superresolution imaging was performed using the Nikon-CSU-W1 Spinning Disk  
754 equipped with a microlensed SoRa emission disk that achieves Super Resolution by  
755 Optical Pixel Reassignment with a xy resolution of 120nm. Images were acquired on an  
756 inverted Nikon Eclipse Ti2 microscope (Nikon Instruments) attached to a Yokogawa  
757 spinning disk unit (CSU-W1 SoRa, Yokogawa Electric) using a 1.49 100x Apo TIRF oil  
758 immersion objective lens. Images were captured by an Andor Sona 4.2B-11 camera  
759 using the 2.8x SoRa relay, resulting in an effective pixel size of ~40 nm. 405, 488, and  
760 561 nm laser lines were used for excitation. All other live and fixed cell imaging was  
761 performed on a Nikon Ti2 Eclipse-CSU-X1 confocal spinning disk microscope equipped  
762 with four laser lines 405nm, 488nm, 561nm and 670nm and an sCMOS Andor camera  
763 for image acquisition. The microscope was caged within the OkoLab environmental

764 control setup enabling temperature and CO<sub>2</sub> control during live imaging. Imaging was  
765 performed using Nikon 1.49 100x Apo 100X or 60X oil objectives. Live imaging for ER  
766 motility and EB3 comet velocity was performed on fibronectin coated MatTek dishes  
767 (MatTek, P35G-1.5-14-C), and images at a single confocal z frame were captured every  
768 2sec. Fixed cell image acquisition was performed as a z stack of images with z distance  
769 of 0.3micron. Viafluor microtubule live imaging dyes (Biotum, #70064, #70063) were  
770 used to visualize microtubules during live imaging. Cells were incubated for 30 minutes  
771 at 37 degrees C with (1:2000) dye in culture media. Subsequently, dye treated media is  
772 replaced with live imaging media with (1:10000) tubulin dye. DNA was stained with  
773 NucBlue™ Live ReadyProbes™ Reagent (Hoechst 33342) (Invitrogen), two drops/mL  
774 live imaging media incubated for 15 minutes at room temperature before imaging.

#### 775 **Protein Purification**

776 TAOK2 C-terminal amino acids 1187-1235 were cloned into pGEX4T1 vector and  
777 transformed into BL21 *E. coli* to bacterially express the GST-tagged TAOK2 1187-1235.  
778 A 25ml starter culture grown from a single colony overnight was used to inoculate 1L  
779 culture, which was allowed to grow to an O.D. of 0.6 at 37°C. Protein expression was  
780 induced by IPTG at a final concentration of 0.4mM for 18 hours at 18°C. Bacteria were  
781 collected by a 15min spin at 5000g, washed with ice cold PBS, and the pellet was  
782 resuspended in ice cold lysis buffer (50mM Tris pH 8.0, 5mM EDTA, 150mM NaCl, 20%  
783 glycerol, 5mM DTT, protease inhibitors and PMSF). Addition of 4mg lysozyme (Sigma)  
784 was followed by 30min incubation with 0.5% TritonX-100 and sonication on ice. The  
785 supernatant was collected after a 60min spin at 25,000g, and incubated with prewashed  
786 GST beads (Thermo Fisher) for 1 hour. Beads were washed with wash buffer (PBS +  
787 1mM DTT + 0.1% tween 20) followed by wash buffer without detergent. Bound protein

788 was eluted and collected in fractions by glutathione elution buffer at pH8.0 (50mM Tris  
789 pH8.0, 250mM KCl, 1mM DTT, 10% glycerol and 30mM glutathione).

#### 790 **Microtubule co-sedimentation assay**

791 Microtubules were prepared by polymerizing porcine tubulin (Cytoskeleton inc.) in  
792 general tubulin buffer (80mM PIPES pH 6.9, 2mM MgCl<sub>2</sub>, 0.4mM EGTA, Roche  
793 Protease Inhibitors) in the presence of 1mM GTP for 20 minutes at 35°C and then  
794 diluted further. To prevent depolymerization, microtubules were treated with 40 µM  
795 Taxol. Microtubules and 5 µg purified protein were incubated at room temperature, and  
796 pelleted at 100,000g over a 60% glycerol cushion buffer (80mM PIPES pH 7.0, 1 mM  
797 MgCl<sub>2</sub>, 1 mM EGTA, 60% Glycerol, protease inhibitor). The supernatant (top layer  
798 above cushion) and the pellet were removed and treated with 4X Sample Buffer with  
799 250mM DTT and 5% beta-mercaptoethanol. Resultant samples were subject to SDS-  
800 PAGE and colloidal Coomassie blue staining (Invitrogen).

#### 801 **Mitotic cell lysate**

802 HEK293T cells were synchronized by treatment with 1.67µM nocodazole for 12-16  
803 hours. Rounded cells were dislodged by shaking and collected with media. Concurrently,  
804 untreated asynchronously growing HEK293T cells were scraped and collected in DPBS.  
805 Both tubes of cells were separately pelleted, washed in DPBS, and lysed in HKT buffer  
806 (25mM HEPES pH7.2, 150mM KCl, 1% Triton X-100, 1mM DTT, 1 mM EDTA, Protease  
807 Inhibitors (Roche, Complete), Halt Phosphatase Inhibitors (Thermo Fisher). Lysate was  
808 cleared of cell debris by centrifugation and protein concentrations were determined via  
809 BCA assay (Thermo Fisher). Sample Buffer with 125mM DTT was added to equalized  
810 amounts of protein and subject to western blot analysis as described above.

#### 811 **Immunoprecipitation Kinase Assay**

812 HEK293T cells transfected with sfGFP-TAOK2 WT and sfGFP-TAOK2 K57A were lysed  
813 with HKT buffer (25mM HEPES pH7.2, 150mM KCl, 1% Triton X-100, 1mM DTT, 1 mM

814 EDTA, Protease Inhibitors (Roche, Complete)). Lysate was precleared with Pierce  
815 ProteinG Agarose (Thermo Fisher), and immunoprecipitated with Roche anti-GFP  
816 Mouse antibody bound on Pierce protein G agarose. Beads were washed twice with  
817 HKT, once for 10 minutes with HKT with 1mM NaCl, and finally washed with HK buffer  
818 (25mM HEPES pH 7.2, 150mM KCl, 1mM DTT, 1 mM EDTA, Protease Inhibitors  
819 (Roche, Complete EDTA free)). Beads were washed once with the Kinase Buffer (25mM  
820 Tris pH 7.5, 10mM MgCl<sub>2</sub>, 1mM DTT) prior to the in vitro kinase assay. Kinase assay  
821 was then performed by incubating with 0.5mM ATP and Halt protease/phosphatase  
822 inhibitors (Thermo Fisher) for 45 minutes at 30°C on a shaking heat block. Samples  
823 were then subjected to western blot analysis detailed above to detect  
824 autophosphorylation of TAOK2 at S181 using the rabbit antibody (R&D Systems,  
825 PPS037).

## 826 **Statistics**

827 All statistics were performed in GraphPad software Prism9.0. Multiple groups were  
828 analyzed using ANOVA, while two group comparisons were made using unpaired t-test  
829 unless otherwise stated. Statistically p value less than 0.05 was considered significant.  
830 All experiments were done in triplicate, and experimental sample size and p values are  
831 indicated with the corresponding figures.

832



## 833 **References**

834

835 Carlton, J.G., Jones, H., and Eggert, U.S. (2020). Membrane and organelle dynamics  
836 during cell division. *Nat. Rev. Mol. Cell Biol.* 21, 151–166.

837 Chen, Z., Hutchison, M., and Cobb, M.H. (1999). Isolation of the protein kinase TAO2  
838 and identification of its mitogen-activated protein kinase/extracellular signal-regulated  
839 kinase kinase binding domain. *J. Biol. Chem.* 274, 28803–28807.

840 Chen, Z., Raman, M., Chen, L., Lee, S.F., Gilman, A.G., and Cobb, M.H. (2003). TAO  
841 (thousand-and-one amino acid) protein kinases mediate signaling from carbachol to p38  
842 mitogen-activated protein kinase and ternary complex factors. *J. Biol. Chem.* 278,  
843 22278–22283.

844 Combet, C., Blanchet, C., Geourjon, C., and Deléage, G. (2000). NPS@: network  
845 protein sequence analysis. *Trends Biochem Sci* 25, 147–150.

846 Cox, J.S., Shamu, C.E., and Walter, P. (1993). Transcriptional induction of genes  
847 encoding endoplasmic reticulum resident proteins requires a transmembrane protein  
848 kinase. *Cell* 73, 1197–1206.

849 Cui-Wang, T., Hanus, C., Cui, T., Helton, T., Bourne, J., Watson, D., Harris, K.M., and  
850 Ehlers, M.D. (2012). Local zones of endoplasmic reticulum complexity confine cargo in  
851 neuronal dendrites. *Cell* 148, 309–321.

852 de Anda, F.C., Rosario, A.L., Durak, O., Tran, T., Gräff, J., Meletis, K., Rei, D., Soda, T.,  
853 Madabhushi, R., Ginty, D.D., et al. (2012). Autism spectrum disorder susceptibility gene  
854 TAOK2 affects basal dendrite formation in the neocortex. *Nat. Neurosci.* 15, 1022–1031.

855 Dong, R., Zhu, T., Benedetti, L., Gowrishankar, S., Deng, H., Cai, Y., Wang, X., Shen,  
856 K., and De Camilli, P. (2018). The inositol 5-phosphatase INPP5K participates in the fine  
857 control of ER organization. *J. Cell Biol.* 217, 3577–3592.

858 Farías, G.G., Fréal, A., Tortosa, E., Stucchi, R., Pan, X., Portegies, S., Will, L., Altelaar,  
859 M., and Hoogenraad, C.C. (2019). Feedback-Driven Mechanisms between Microtubules  
860 and the Endoplasmic Reticulum Instruct Neuronal Polarity. *Neuron* 102, 184–201.e188.

861 Friedman, J.R., Webster, B.M., Mastronarde, D.N., Verhey, K.J., and Voeltz, G.K.  
862 (2010). ER sliding dynamics and ER-mitochondrial contacts occur on acetylated  
863 microtubules. *J. Cell Biol.* 190, 363–375.

864 Gautier, R., Douguet, D., Antonny, B., and Drin, G. (2008). HELIQUEST: a web server to  
865 screen sequences with specific alpha-helical properties. *Bioinformatics* 24, 2101–2102.

866 Grigoriev, I., Gouveia, S.M., van der Vaart, B., Demmers, J., Smyth, J.T., Honnappa, S.,  
867 Splinter, D., Steinmetz, M.O., Putney, J.W., Hoogenraad, C.C., et al. (2008). STIM1 is a  
868 MT-plus-end-tracking protein involved in remodeling of the ER. *Curr. Biol.* 18, 177–182.



- 869 Harding, H.P., Zhang, Y., and Ron, D. (1999). Protein translation and folding are coupled  
870 by an endoplasmic-reticulum-resident kinase. *Nature* 397, 271–274.
- 871 Hazan, J., Fonknechten, N., Mavel, D., Paternotte, C., Samson, D., Artiguenave, F.,  
872 Davoine, C.S., Cruaud, C., Dürr, A., Wincker, P., et al. (1999). Spastin, a new AAA  
873 protein, is altered in the most frequent form of autosomal dominant spastic paraplegia.  
874 *Nat. Genet.* 23, 296–303.
- 875 Hoyer, M.J., Chitwood, P.J., Ebmeier, C.C., Striepen, J.F., Qi, R.Z., Old, W.M., and  
876 Voeltz, G.K. (2018). A Novel Class of ER Membrane Proteins Regulates ER-Associated  
877 Endosome Fission. *Cell* 175, 254–265.e14.
- 878 Hu, J., Shibata, Y., Zhu, P.-P., Voss, C., Rismanchi, N., Prinz, W.A., Rapoport, T.A., and  
879 Blackstone, C. (2009). A class of dynamin-like GTPases involved in the generation of  
880 the tubular ER network. *Cell* 138, 549–561.
- 881 Jongsma, M.L.M., Berlin, I., and Neefjes, J. (2015). On the move: organelle dynamics  
882 during mitosis. *Trends Cell Biol.* 25, 112–124.
- 883 Klopfenstein, D.R., Kappeler, F., and Hauri, H.P. (1998). A novel direct interaction of  
884 endoplasmic reticulum with microtubules. *Embo J.* 17, 6168–6177.
- 885 Krogh, A., Larsson, B., Heijne, von, G., and Sonnhammer, E.L. (2001). Predicting  
886 transmembrane protein topology with a hidden Markov model: application to complete  
887 genomes. *J Mol Biol* 305, 567–580.
- 888 Manning, G., Plowman, G.D., Hunter, T., and Sudarsanam, S. (2002). Evolution of  
889 protein kinase signaling from yeast to man. *Trends Biochem Sci* 27, 514–520.
- 890 Mitsopoulos, C., Zihni, C., Garg, R., Ridley, A.J., and Morris, J.D.H. (2003). The  
891 prostate-derived sterile 20-like kinase (PSK) regulates microtubule organization and  
892 stability. *J. Biol. Chem.* 278, 18085–18091.
- 893 Moore, T.M., Garg, R., Johnson, C., Coptcoat, M.J., Ridley, A.J., and Morris, J.D.  
894 (2000). PSK, a novel STE20-like kinase derived from prostatic carcinoma that activates  
895 the c-Jun N-terminal kinase mitogen-activated protein kinase pathway and regulates  
896 actin cytoskeletal organization. *J. Biol. Chem.* 275, 4311–4322.
- 897 Mori, K., Ma, W., Gething, M.J., and Sambrook, J. (1993). A transmembrane protein with  
898 a cdc2+/CDC28-related kinase activity is required for signaling from the ER to the  
899 nucleus. *Cell* 74, 743–756.
- 900 Nikonov, A.V., Hauri, H.-P., Lauring, B., and Kreibich, G. (2007). Climp-63-mediated  
901 binding of microtubules to the ER affects the lateral mobility of translocon complexes. *J.*  
902 *Cell. Sci.* 120, 2248–2258.
- 903 Orso, G., Pendin, D., Liu, S., Toso, J., Moss, T.J., Faust, J.E., Micaroni, M., Egorova,  
904 A., Martinuzzi, A., McNew, J.A., et al. (2009). Homotypic fusion of ER membranes  
905 requires the dynamin-like GTPase atlastin. *Nature* 460, 978–983.

- 906 Pavez, M., Thompson, A.C., Arnott, H.J., Mitchell, C.B., D'Atri, I., Don, E.K., Chilton,  
907 J.K., Scott, E.K., Lin, J.Y., Young, K.M., et al. (2019). STIM1 Is Required for Remodeling  
908 of the Endoplasmic Reticulum and Microtubule Cytoskeleton in Steering Growth Cones.  
909 *J. Neurosci.* 39, 5095–5114.
- 910 Pendin, D., McNew, J.A., and Daga, A. (2011). Balancing ER dynamics: shaping,  
911 bending, severing, and mending membranes. *Curr Opin Cell Biol* 23, 435–442.
- 912 Raman, M., Earnest, S., Zhang, K., Zhao, Y., and Cobb, M.H. (2007). TAO kinases  
913 mediate activation of p38 in response to DNA damage. *Embo J.* 26, 2005–2014.
- 914 Richter, M., Murtaza, N., Scharrenberg, R., White, S.H., Johanns, O., Walker, S., Yuen,  
915 R.K.C., Schwanke, B., Bedürftig, B., Henis, M., et al. (2018). Altered TAO2 activity  
916 causes autism-related neurodevelopmental and cognitive abnormalities through RhoA  
917 signaling. *Mol. Psychiatry* 20, 1237.
- 918 Roll-Mecak, A., and Vale, R.D. (2008). Structural basis of microtubule severing by the  
919 hereditary spastic paraplegia protein spastin. *Nature* 451, 363–367.
- 920 Ron, D., and Walter, P. (2007). Signal integration in the endoplasmic reticulum unfolded  
921 protein response. *Nat. Rev. Mol. Cell Biol.* 8, 519–529.
- 922 Schlaitz, A.-L., Thompson, J., Wong, C.C.L., Yates, J.R., and Heald, R. (2013).  
923 REEP3/4 ensure endoplasmic reticulum clearance from metaphase chromatin and  
924 proper nuclear envelope architecture. *Dev. Cell* 26, 315–323.
- 925 Scorrano, L., De Matteis, M.A., Emr, S., Giordano, F., Hajnóczky, G., Kornmann, B.,  
926 Lackner, L.L., Levine, T.P., Pellegrini, L., Reinisch, K., et al. (2019). Coming together to  
927 define membrane contact sites. *Nat Commun* 10, 1–11.
- 928 Smyth, J.T., DeHaven, W.I., Bird, G.S., and Putney, J.W. (2007). Role of the microtubule  
929 cytoskeleton in the function of the store-operated Ca<sup>2+</sup> channel activator STIM1. *J. Cell.*  
930 *Sci.* 120, 3762–3771.
- 931 Smyth, J.T., Schoborg, T.A., Bergman, Z.J., Riggs, B., and Rusan, N.M. (2015). Proper  
932 symmetric and asymmetric endoplasmic reticulum partitioning requires astral  
933 microtubules. *Open Biol* 5, 150067.
- 934 Terasaki, M., and Reese, T.S. (1994). Interactions among endoplasmic reticulum,  
935 microtubules, and retrograde movements of the cell surface. *Cell Motil. Cytoskeleton* 29,  
936 291–300.
- 937 Terasaki, M., Chen, L.B., and Fujiwara, K. (1986). Microtubules and the endoplasmic  
938 reticulum are highly interdependent structures. *J. Cell Biol.* 103, 1557–1568.
- 939 Ultanir, S.K., Yadav, S., Hertz, N.T., Osés-Prieto, J.A., Claxton, S., Burlingame, A.L.,  
940 Shokat, K.M., Jan, L.Y., and Jan, Y.-N. (2014). MST3 Kinase Phosphorylates TAO1/2 to  
941 Enable Myosin Va Function in Promoting Spine Synapse Development. *Neuron* 84, 968–  
942 982.

- 943 Vedrenne, C., Klopfenstein, D.R., and Hauri, H.-P. (2005). Phosphorylation controls  
944 CLIMP-63-mediated anchoring of the endoplasmic reticulum to microtubules. *Mol. Biol.*  
945 *Cell* 16, 1928–1937.
- 946 Voeltz, G.K., Rolls, M.M., and Rapoport, T.A. (2002). Structural organization of the  
947 endoplasmic reticulum. *EMBO Rep.* 3, 944–950.
- 948 Wang, S., Tukachinsky, H., Romano, F.B., and Rapoport, T.A. (2016). Cooperation of  
949 the ER-shaping proteins atlastin, lunapark, and reticulons to generate a tubular  
950 membrane network. *Elife* 5, 209.
- 951 Waterman-Storer, C.M., and Salmon, E.D. (1998). Endoplasmic reticulum membrane  
952 tubules are distributed by microtubules in living cells using three distinct mechanisms.  
953 *Curr. Biol.* 8, 798–806.
- 954 Wu, H., and Voeltz, G.K. (2021). Reticulon-3 Promotes Endosome Maturation at ER  
955 Membrane Contact Sites. *Dev. Cell* 56, 52–66.e57.
- 956 Wu, H., Carvalho, P., and Voeltz, G.K. (2018). Here, there, and everywhere: The  
957 importance of ER membrane contact sites. *Science* 361, ean5835.
- 958 Yadav, S., Osés-Prieto, J.A., Peters, C.J., Zhou, J., Pleasure, S.J., Burlingame, A.L.,  
959 Jan, L.Y., and Jan, Y.-N. (2017). TAOK2 Kinase Mediates PSD95 Stability and Dendritic  
960 Spine Maturation through Septin7 Phosphorylation. *Neuron* 93, 379–393.
- 961

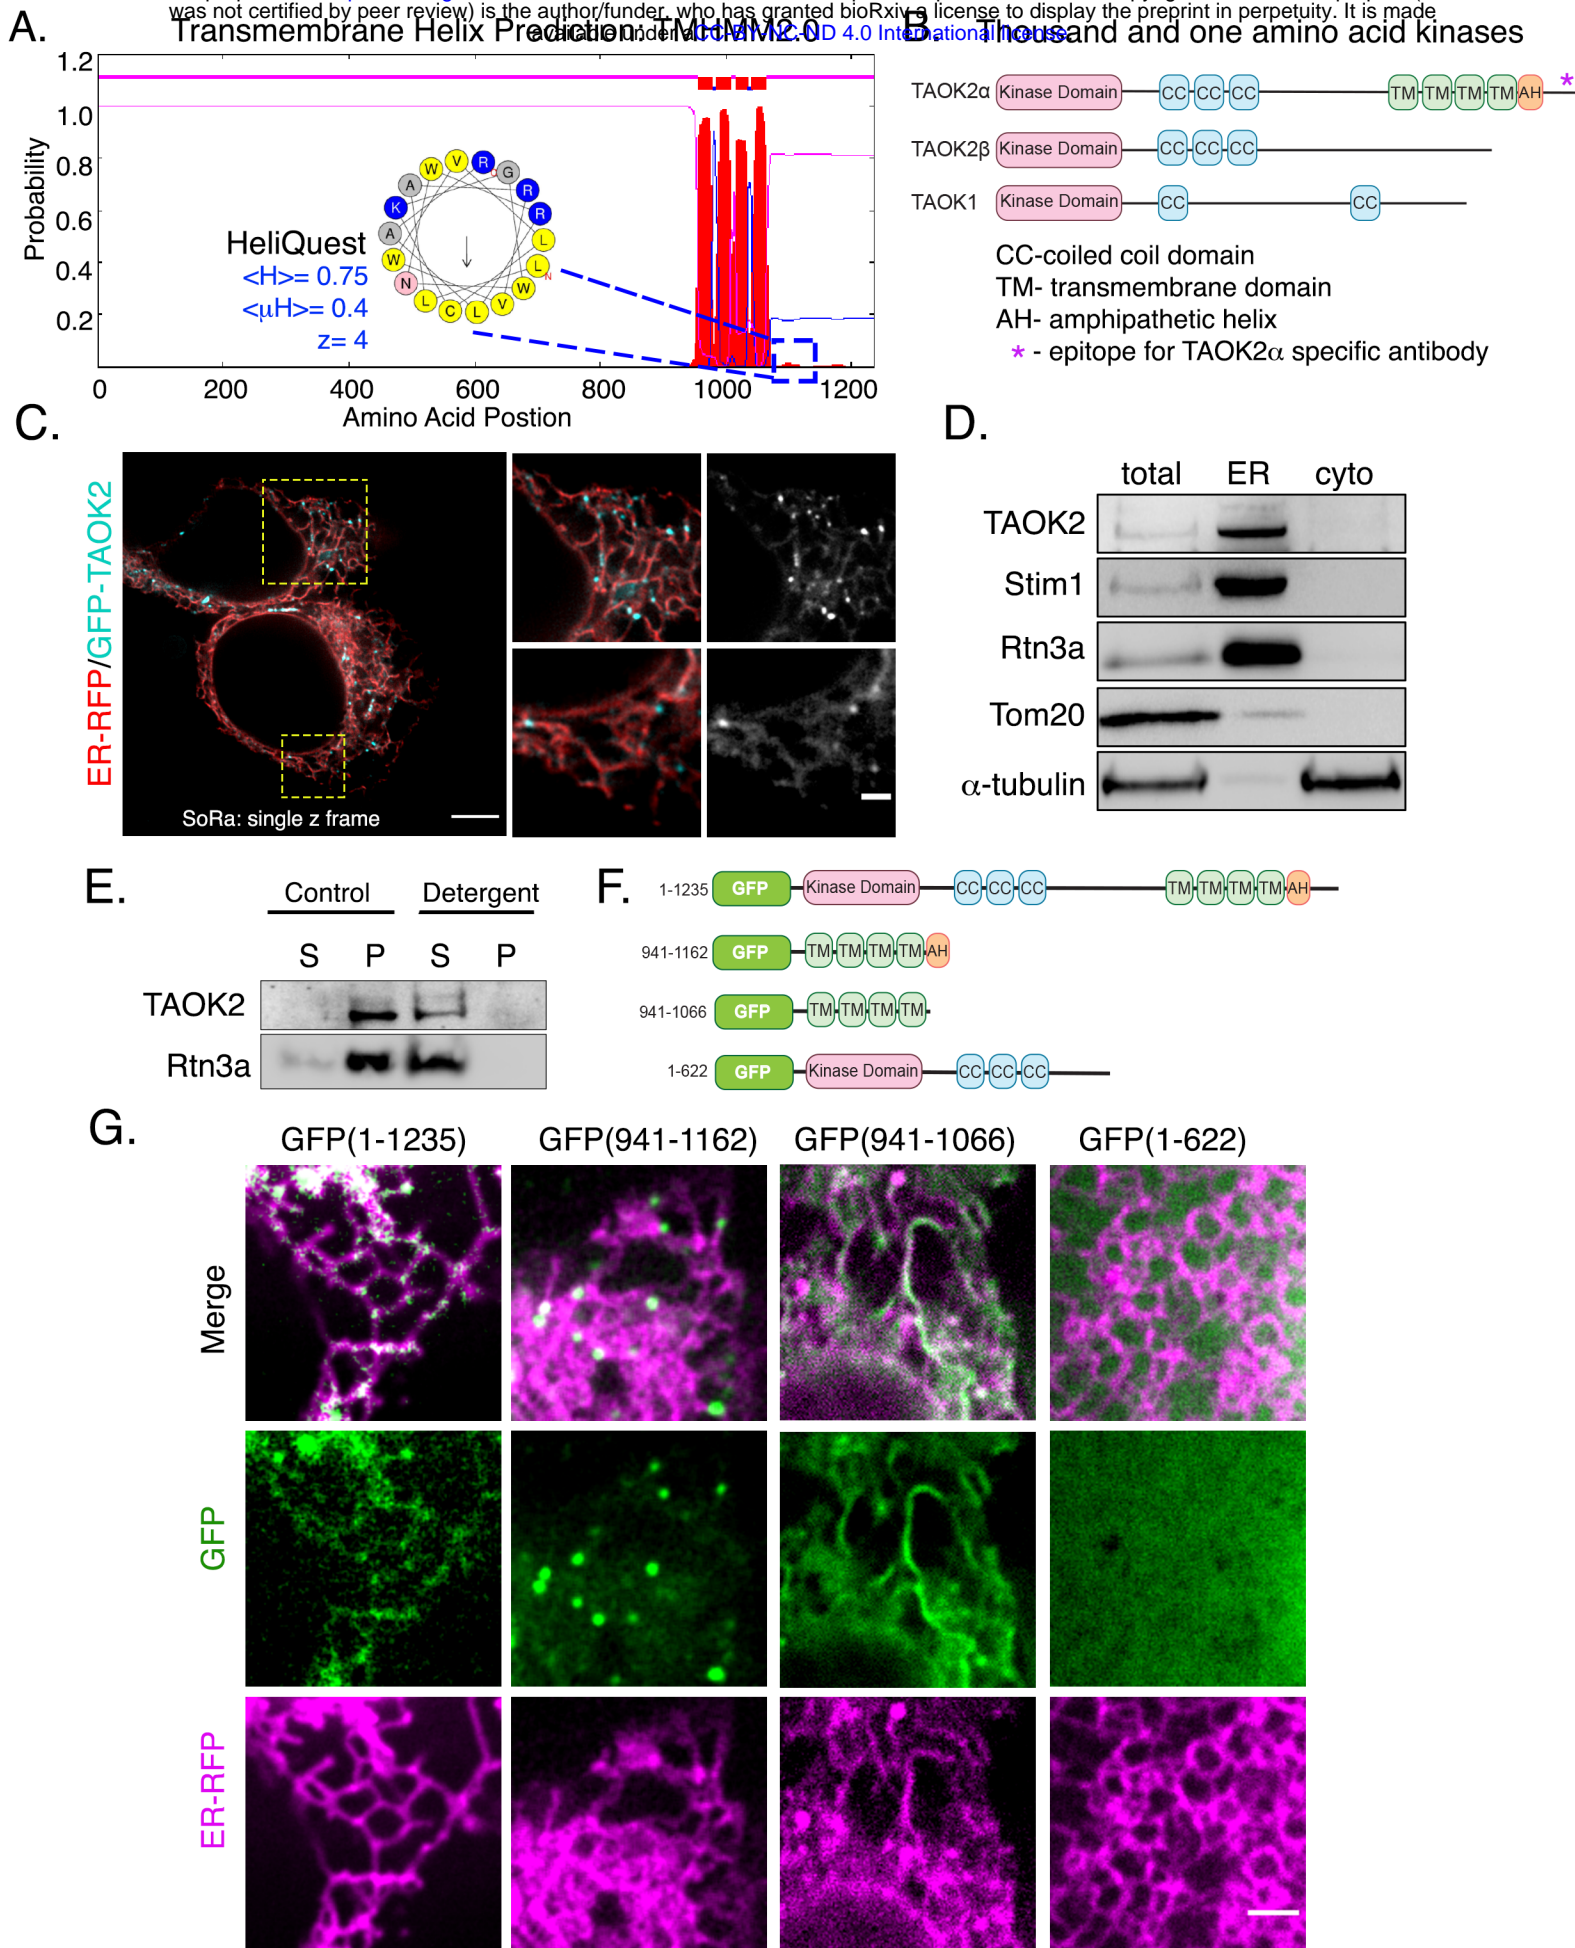

Figure 1



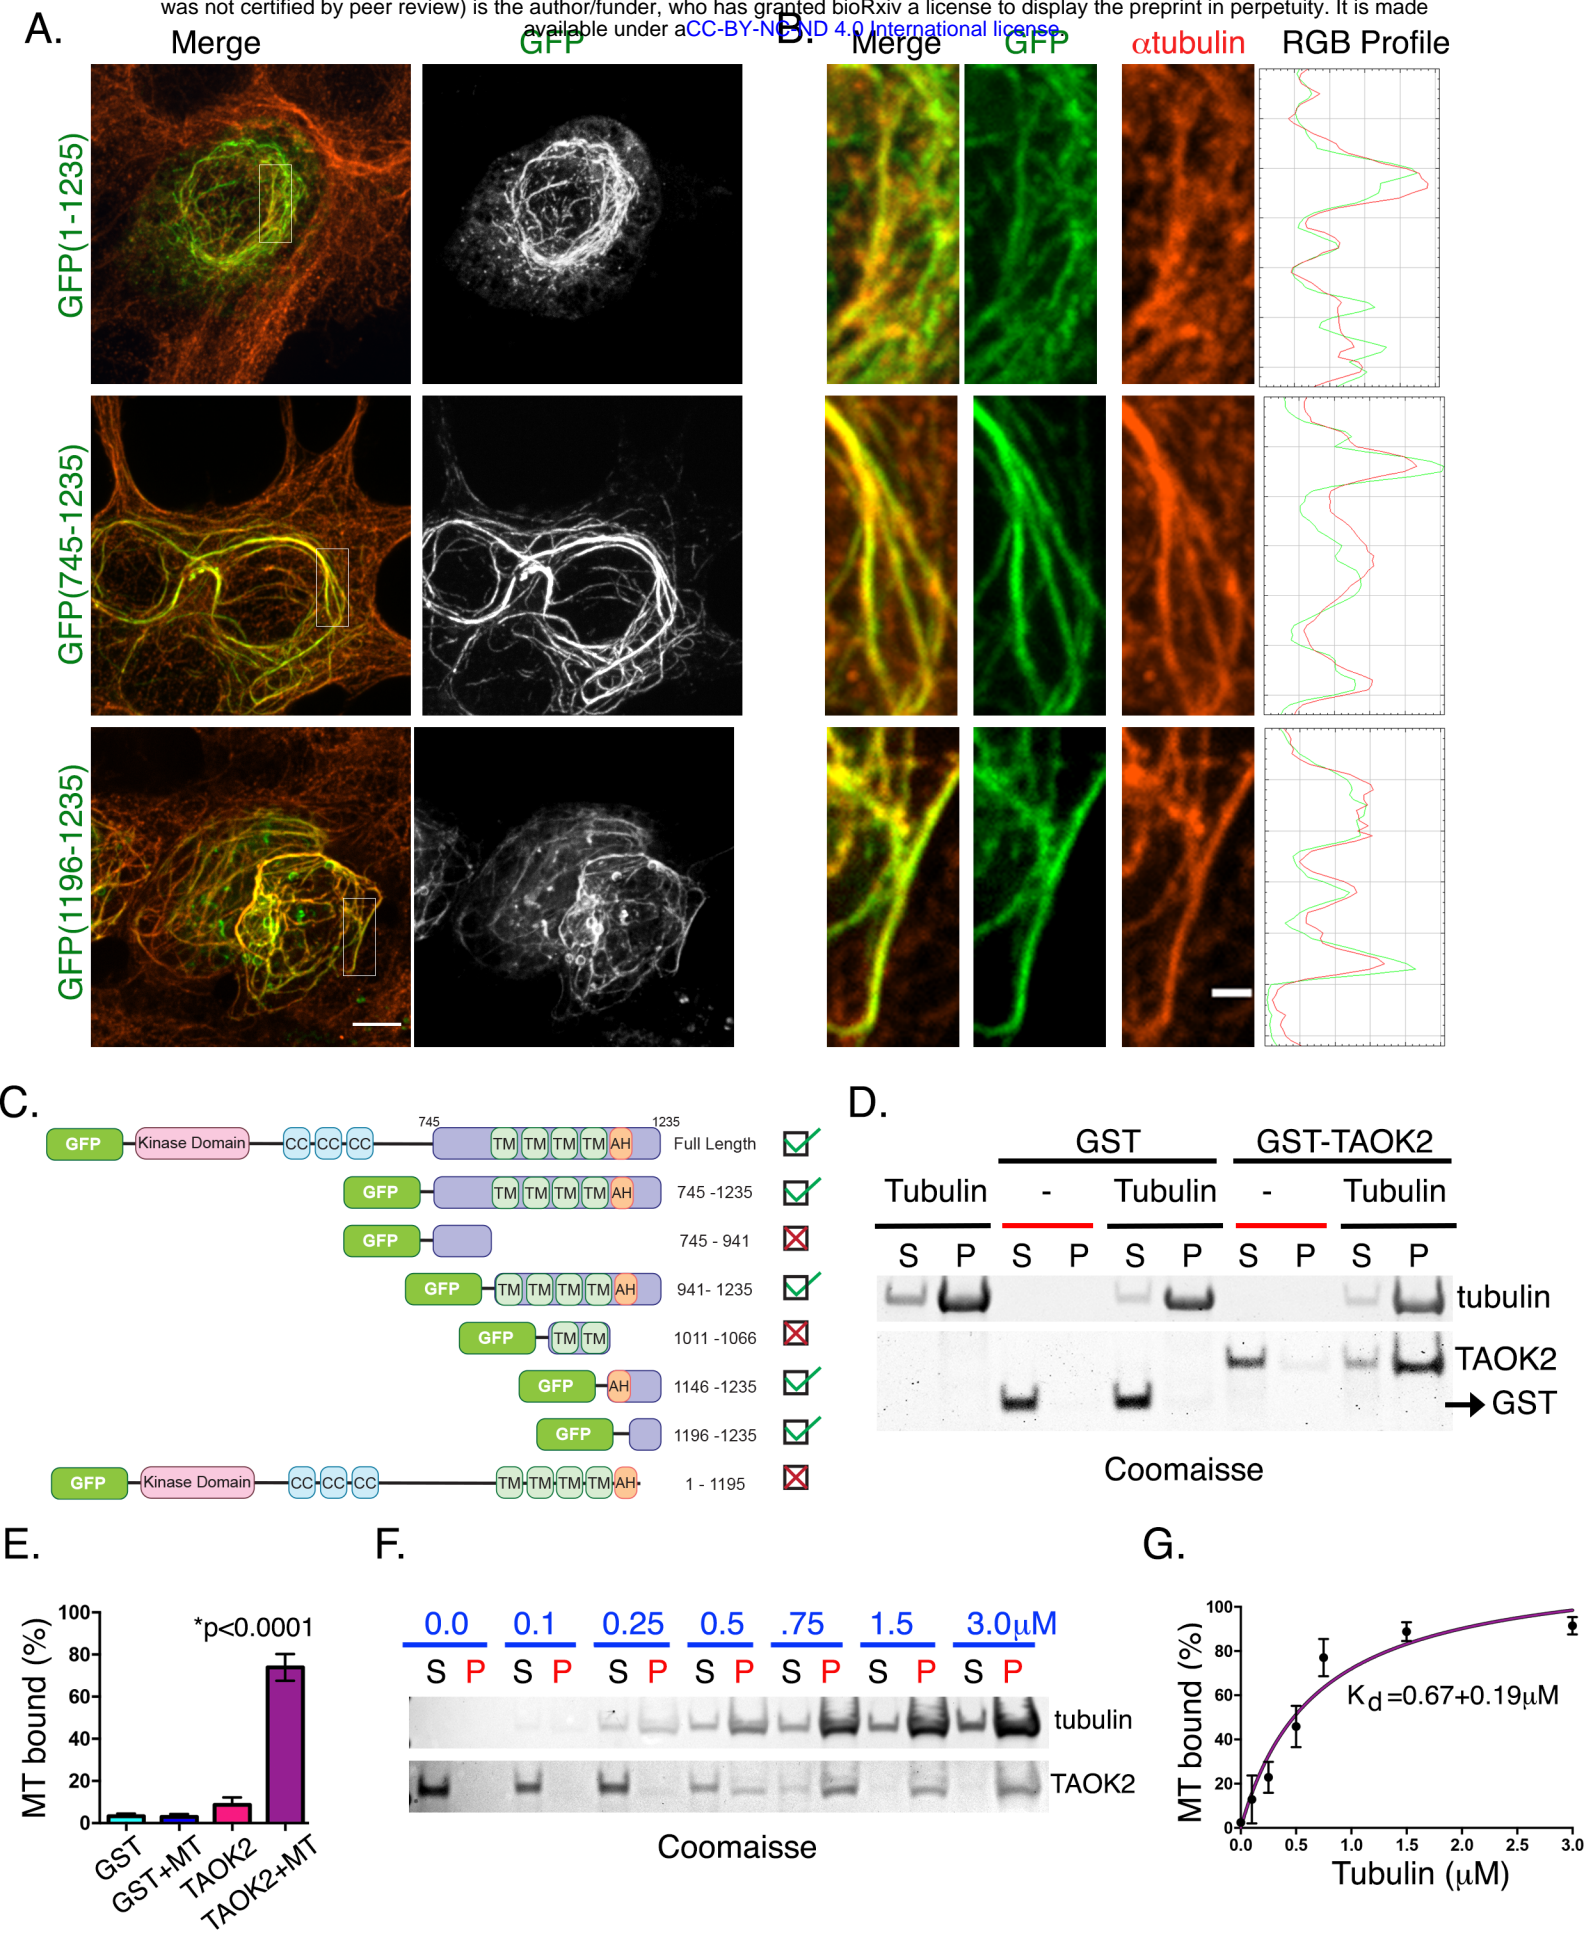

Figure 2

A.

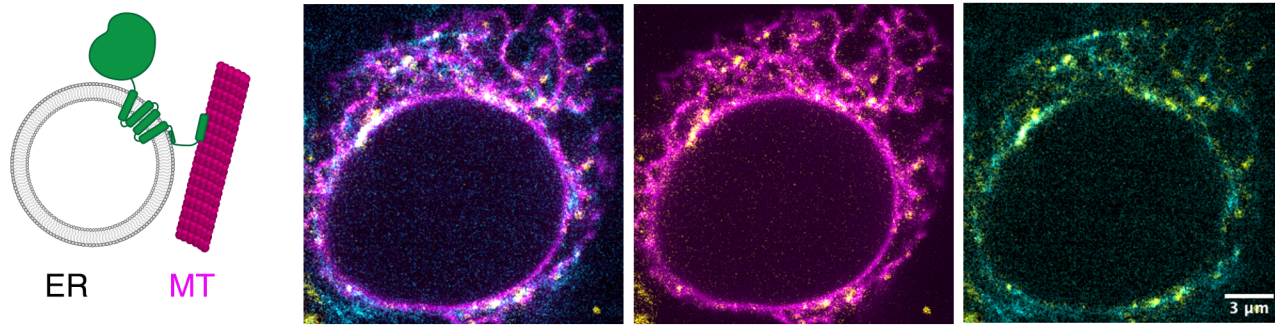

B.

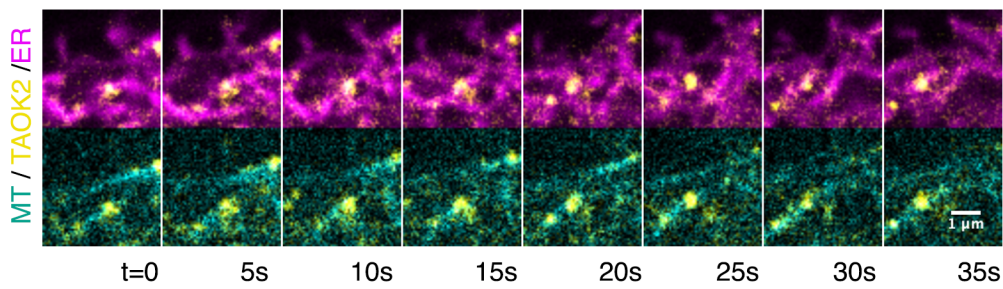

C.

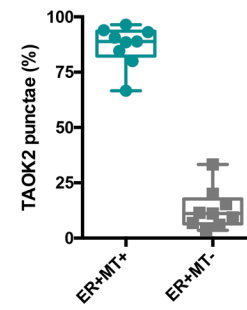

D.

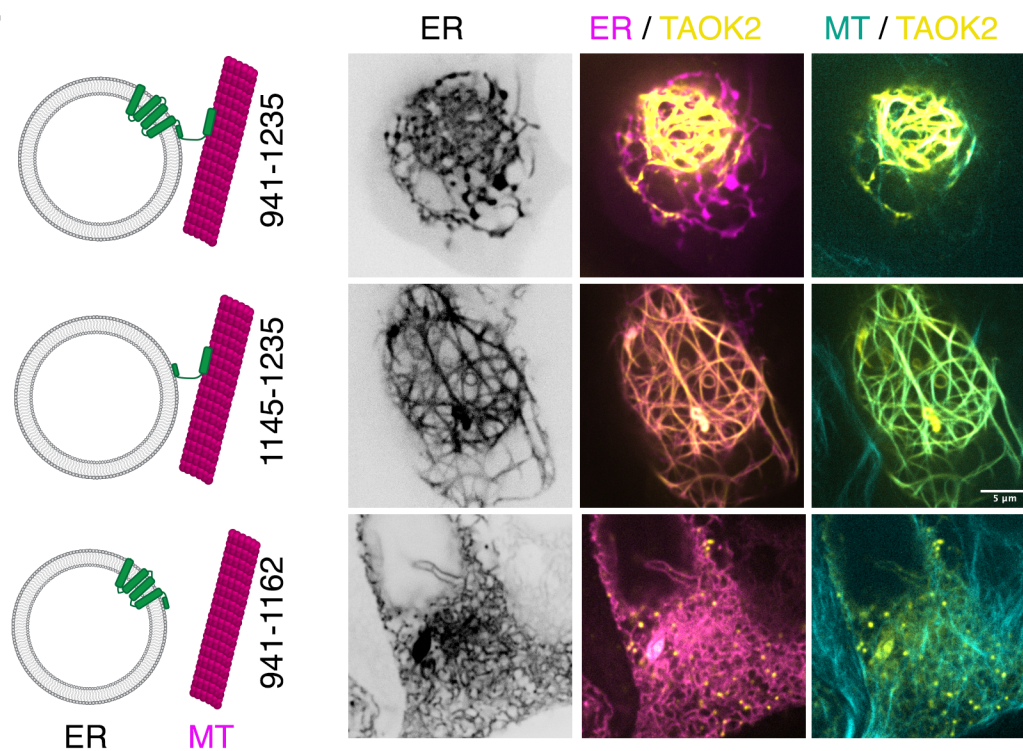

Figure 3



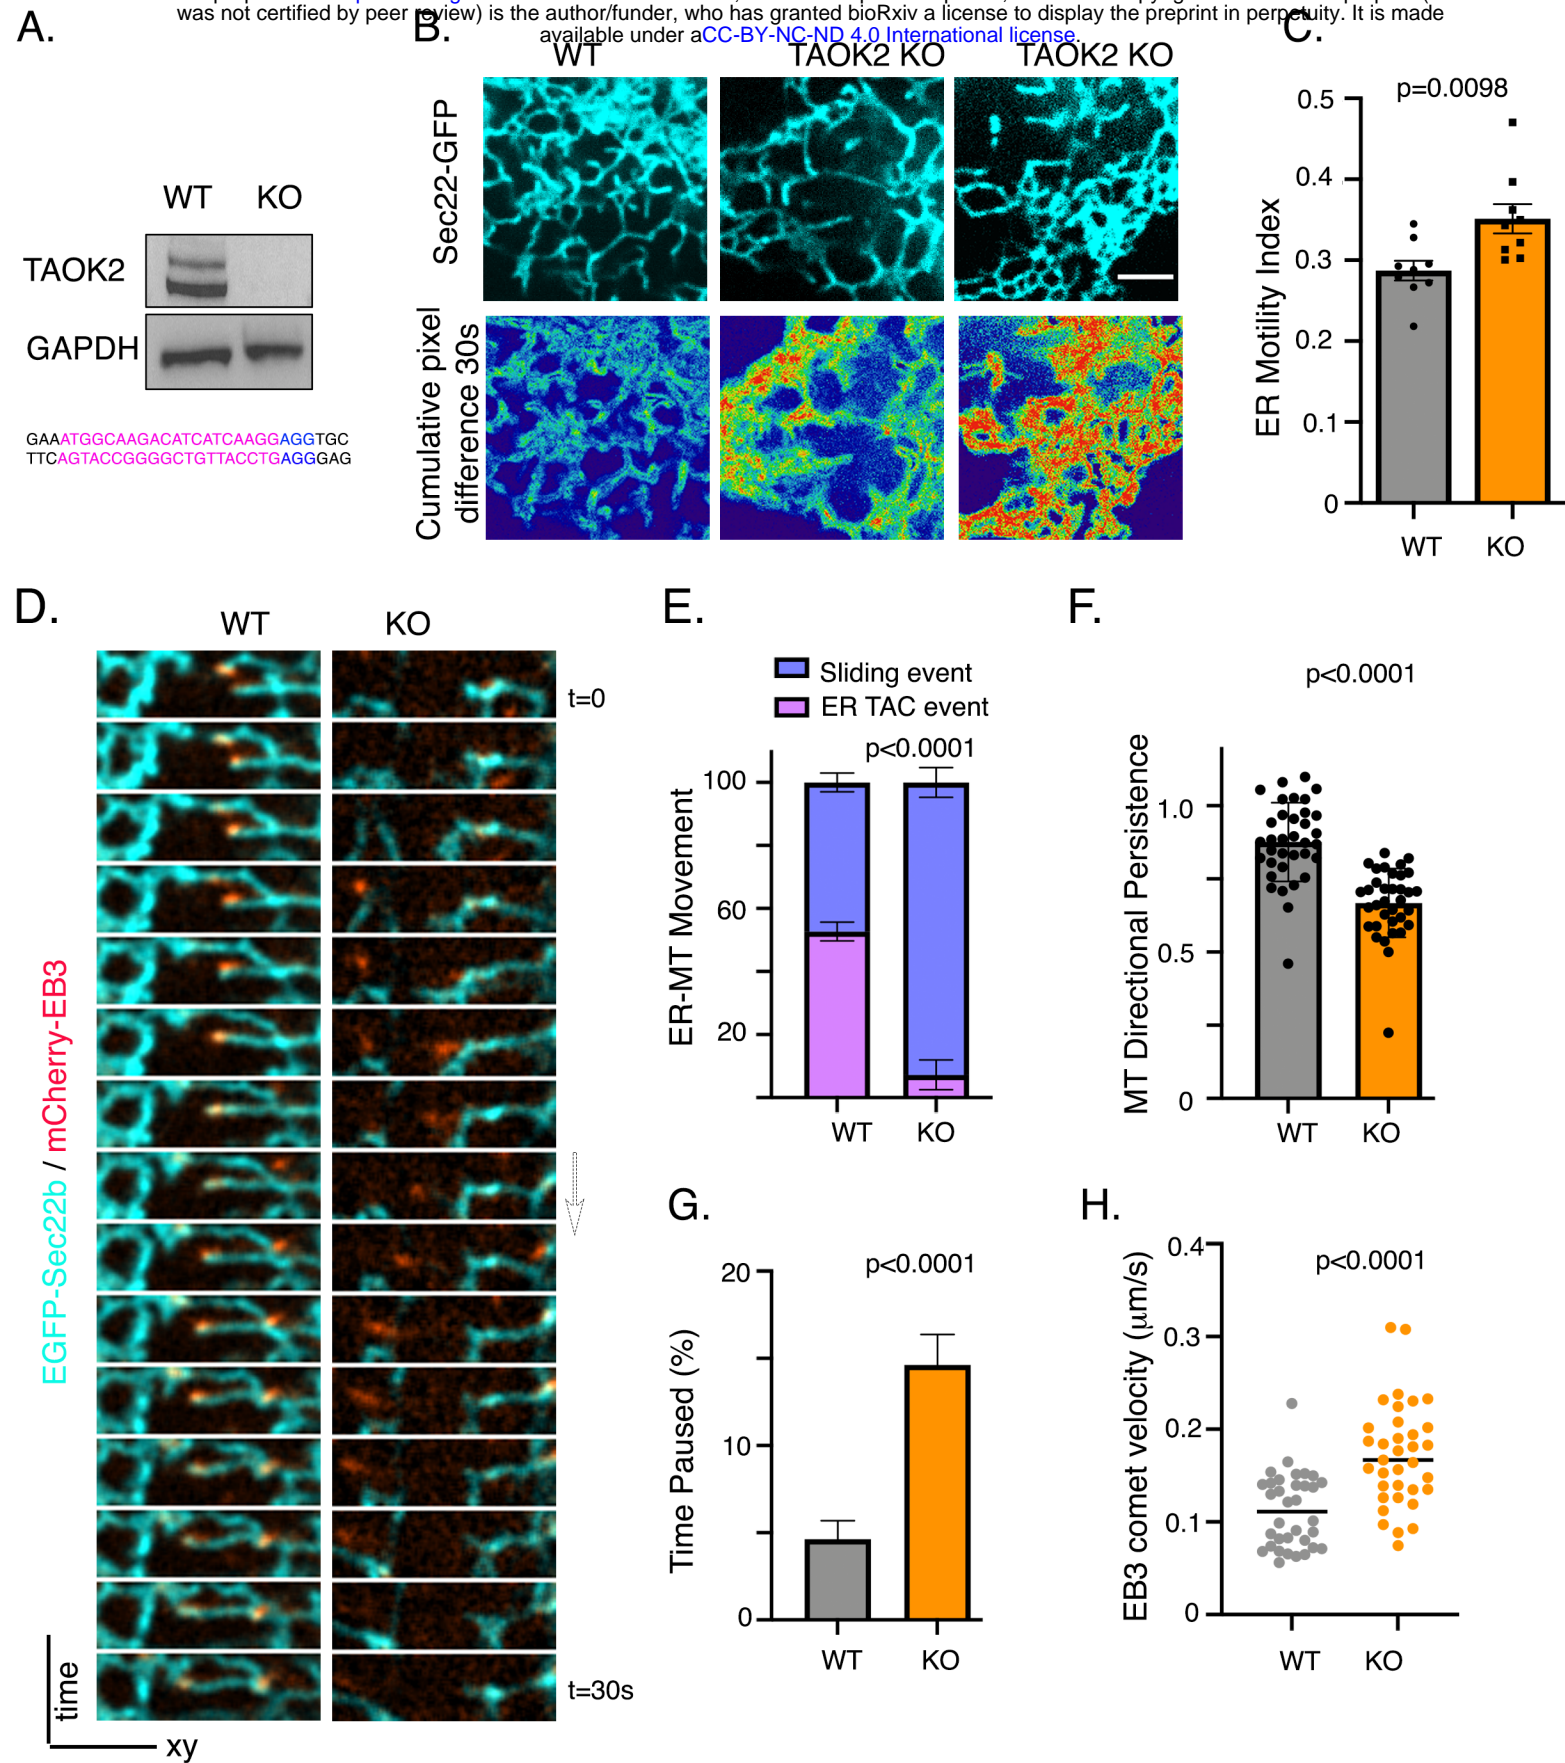

Figure 4



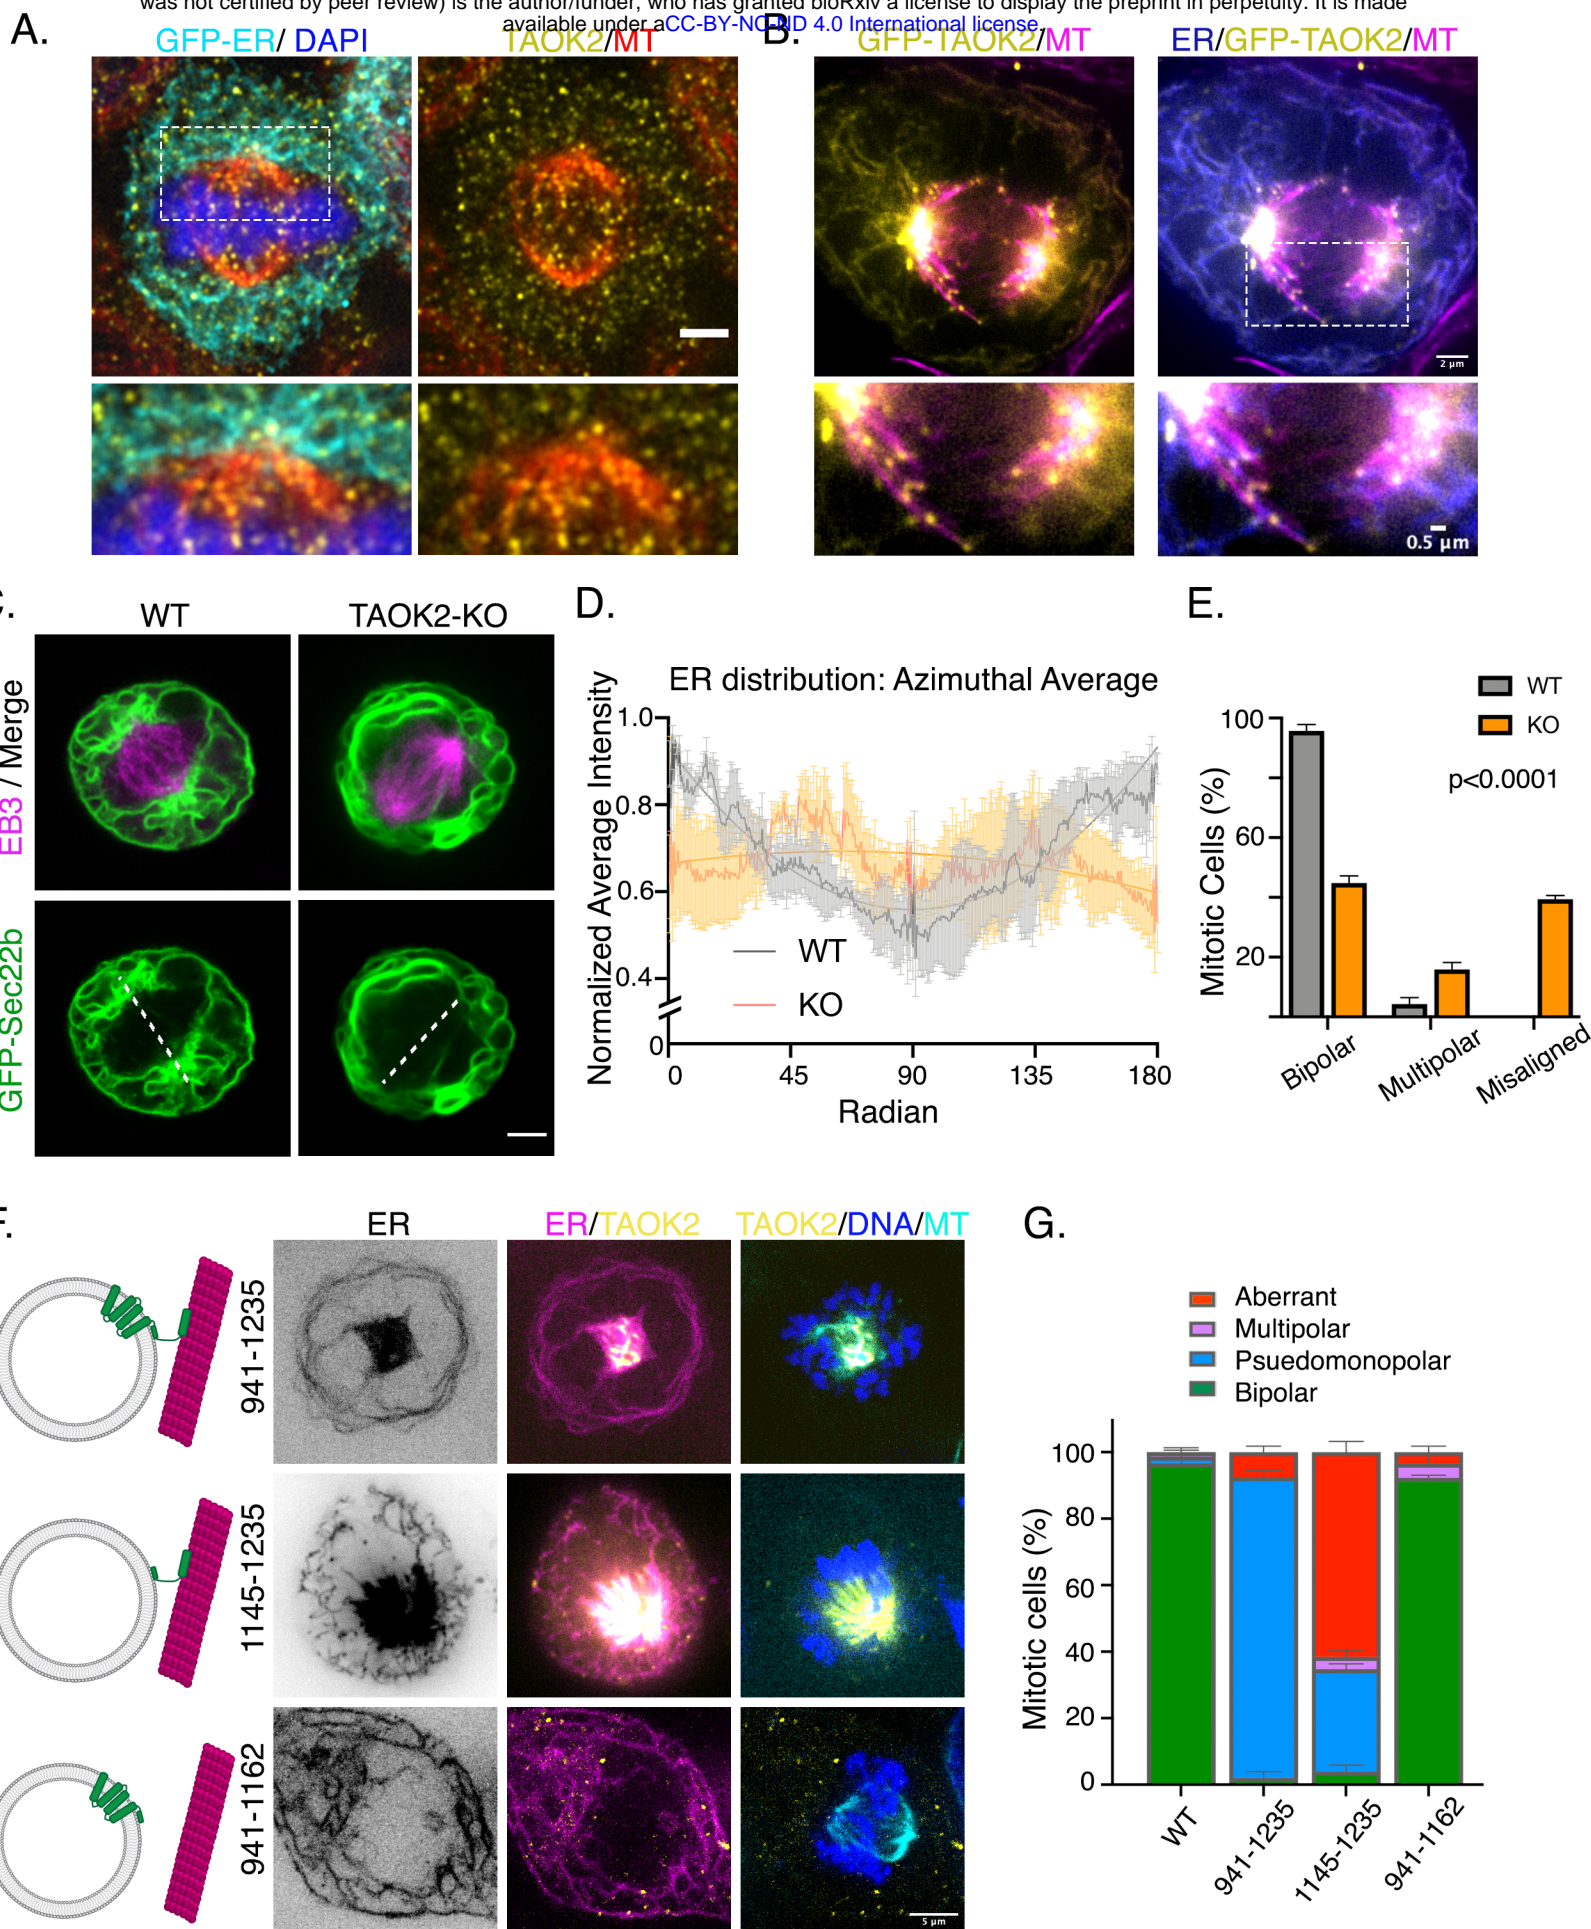

Figure 5



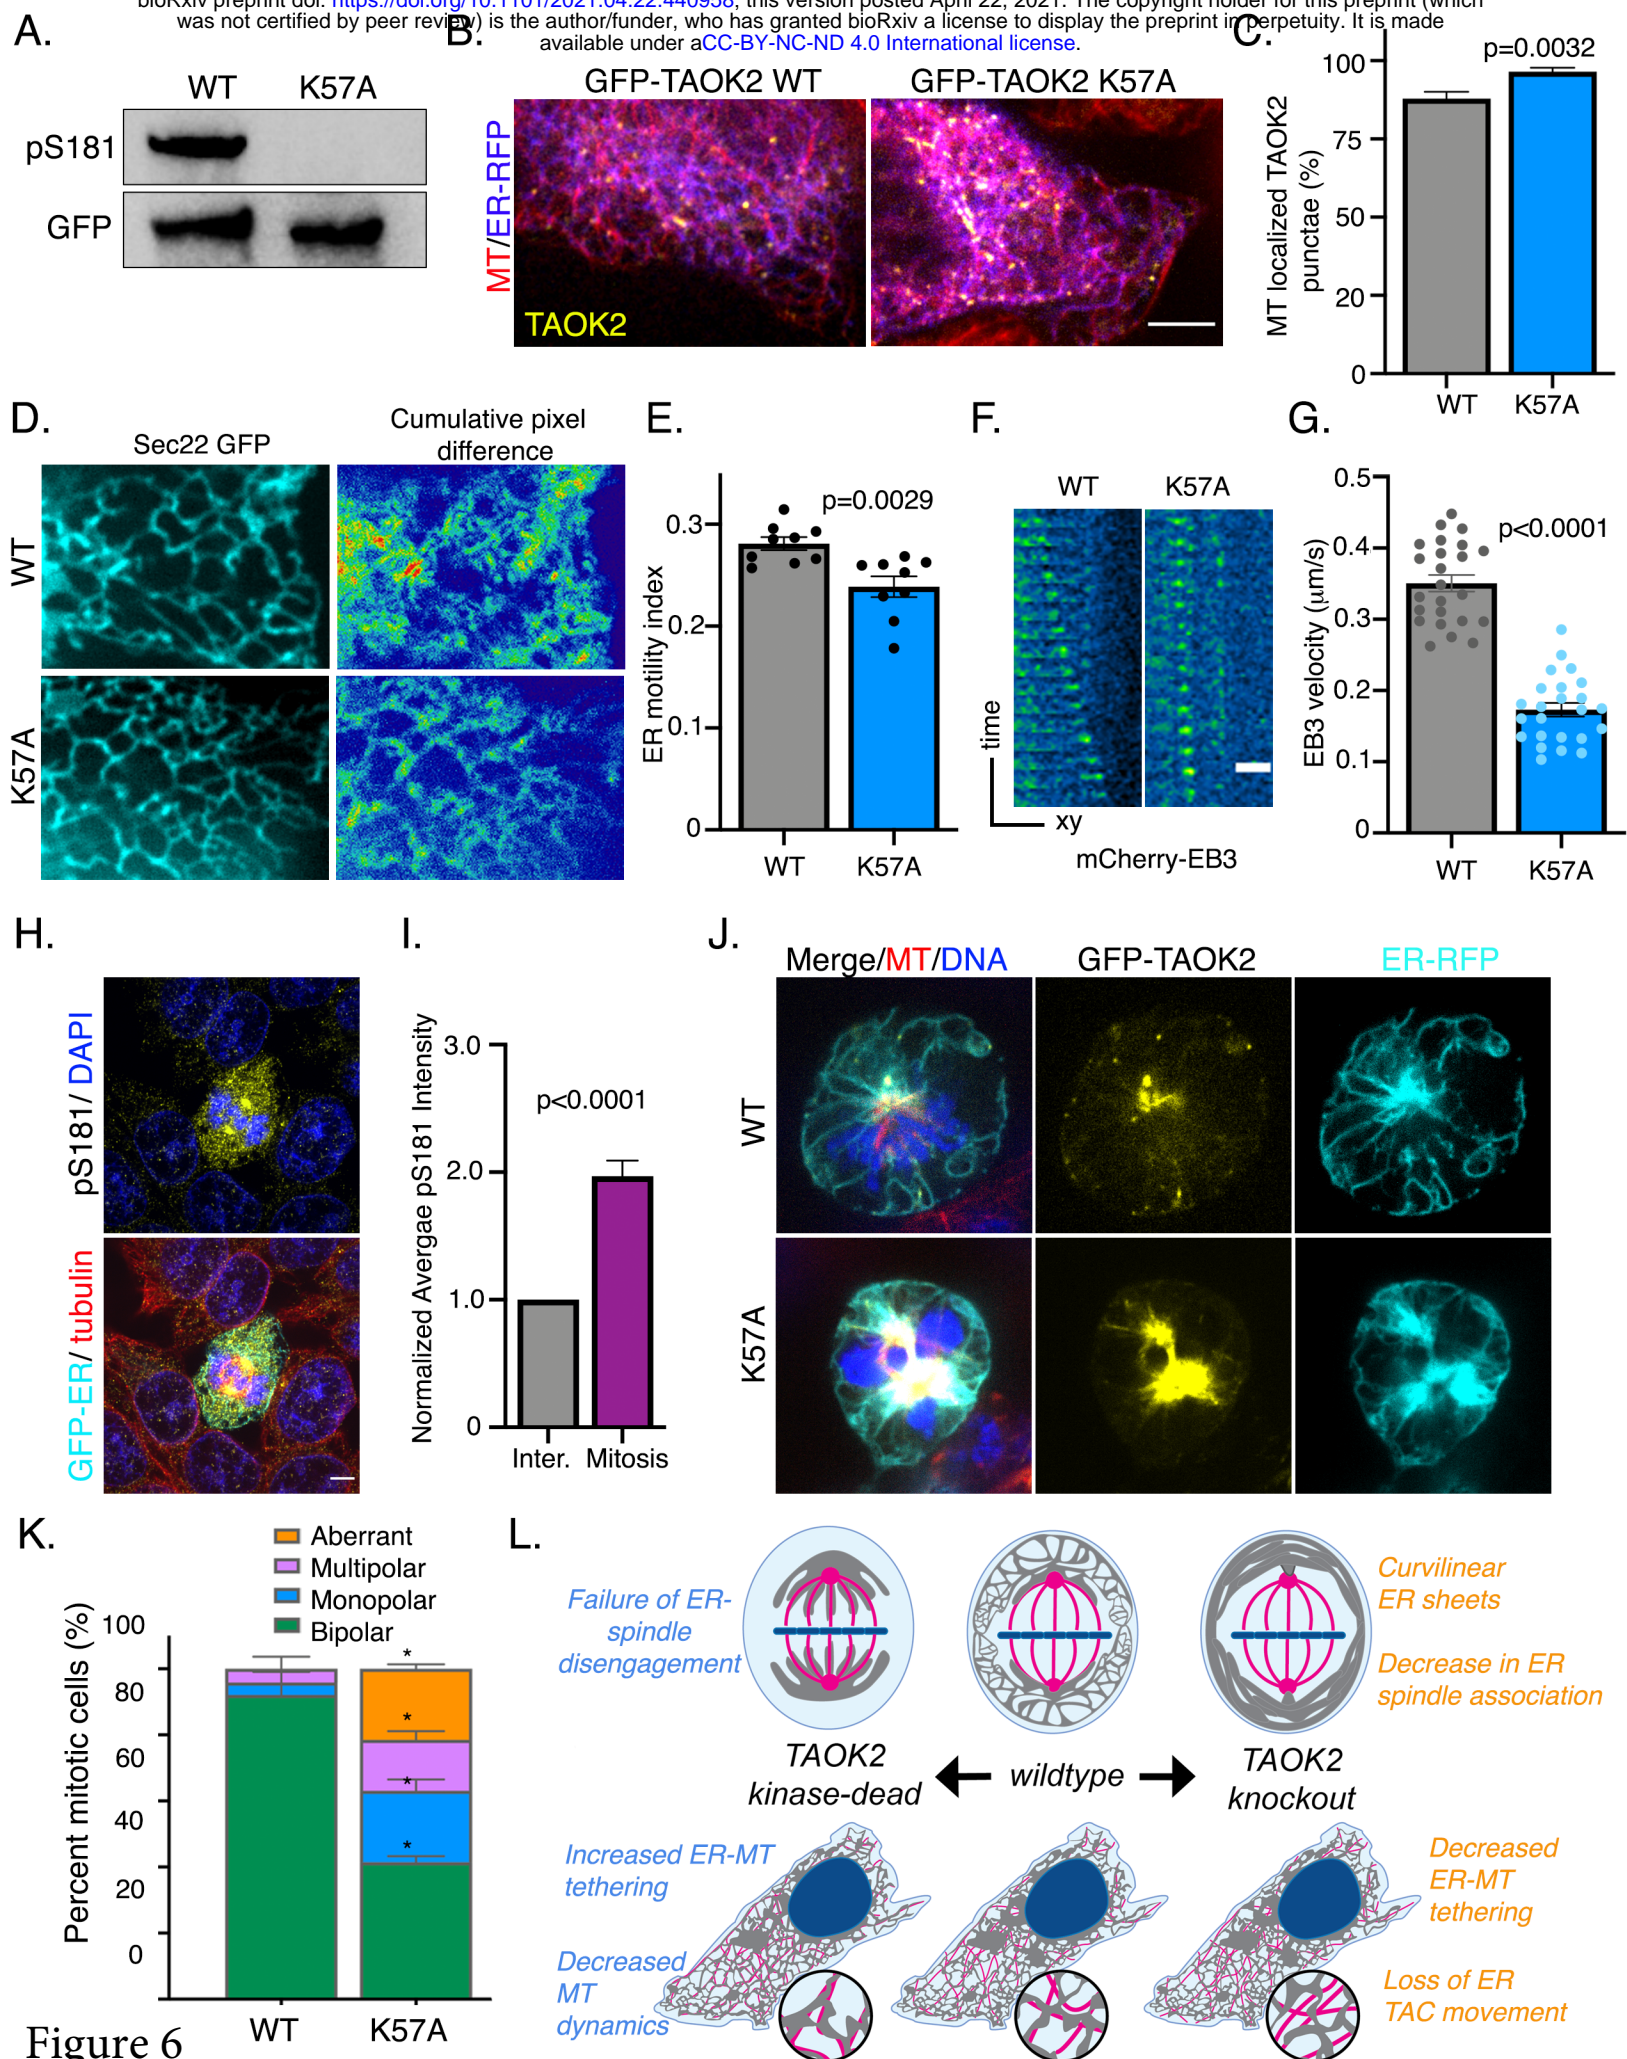

Figure 6

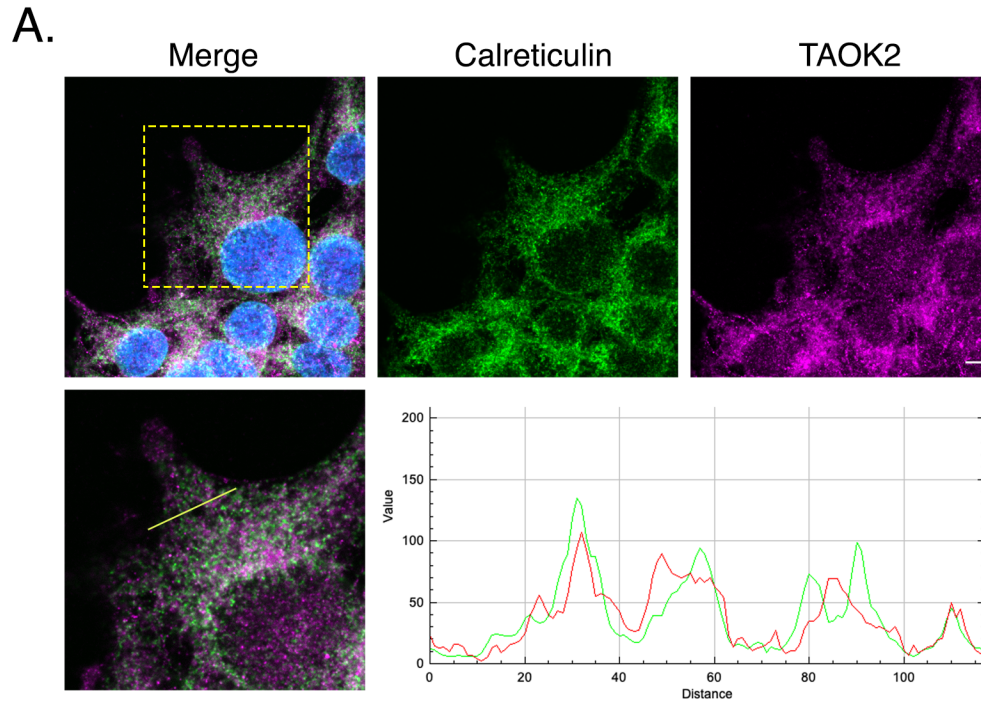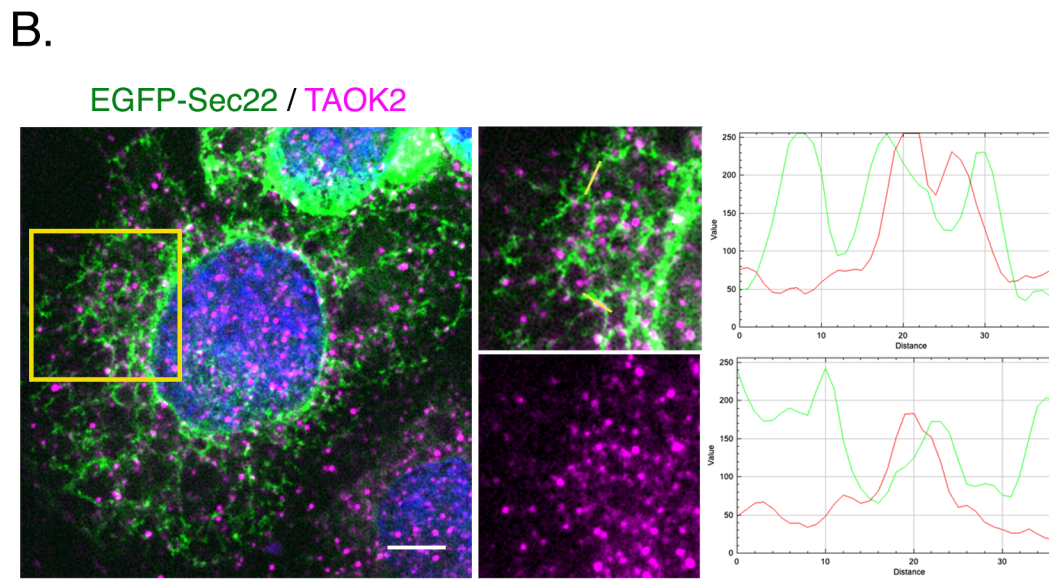

Figure S1



A.

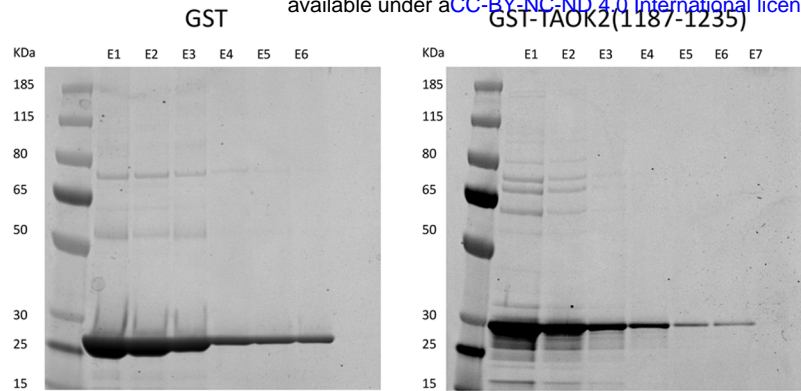

B.

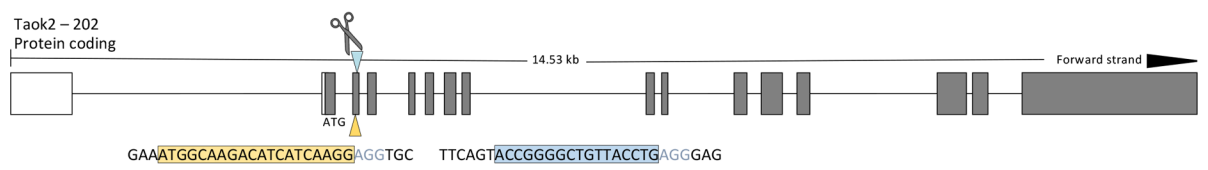

Mutation Pattern

WT CATCATCAAGGAGGTGCGGTTCTTACAGAAGCTCCGGCATCCCAACACCATTTCAGTACCGGGGCTGTTACCTGAGGGAGCACACGGCTTGG  
 KO CATCATCA-----CCTGAGGGAGCACACGGCTTGG

C.

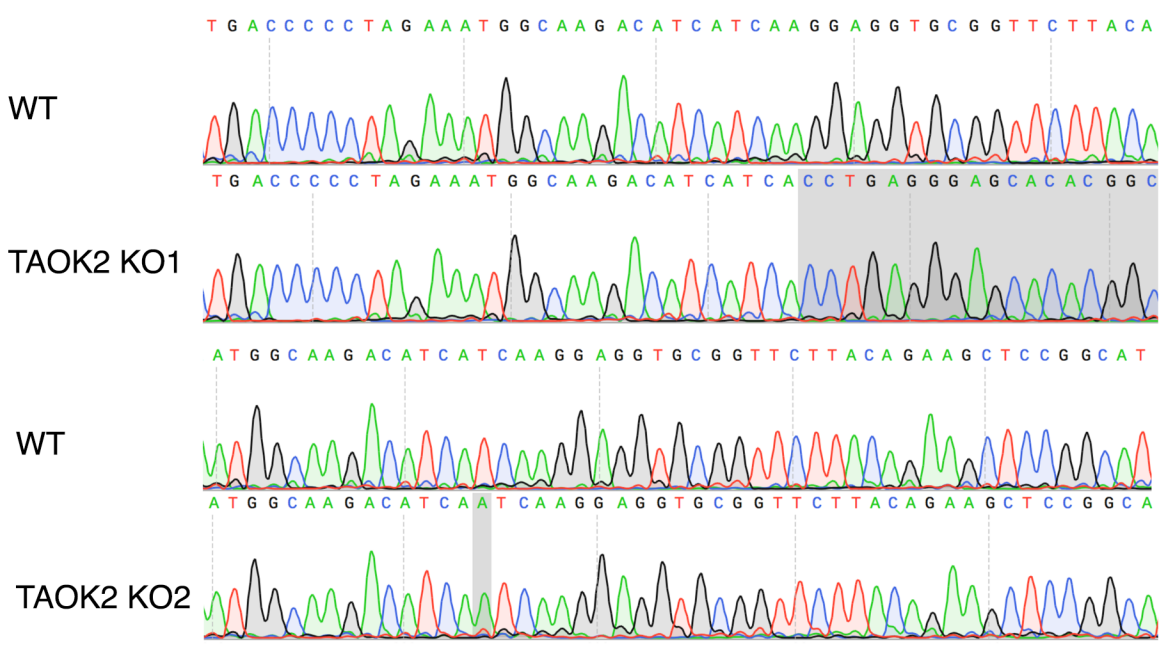

Figure S2

A.

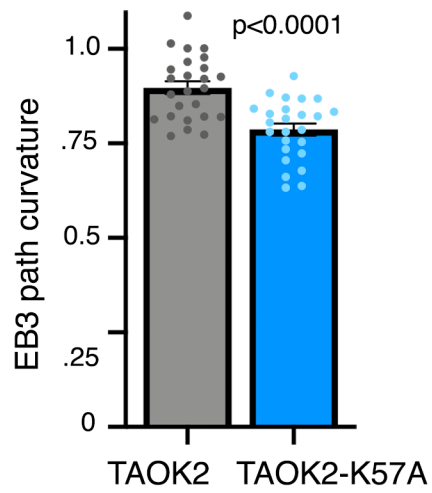

B.

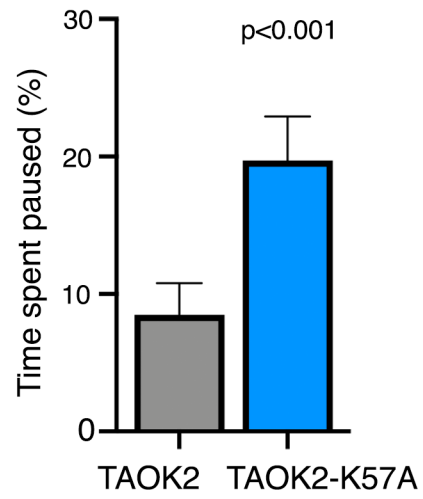

Figure S3

## **TAOK2 is an ER-localized kinase that catalyzes the dynamic tethering of ER to microtubules**

*Kimya Nourbakhsh<sup>1#</sup>, Amy A. Ferreccio<sup>1#</sup>, Matthew J. Bernard<sup>1</sup> and Smita Yadav<sup>1\*</sup>*

*# denotes equal contribution*

*<sup>1</sup>: Department of Pharmacology, University of Washington, Seattle, WA 98195*

*\* Corresponding author, [smitay@uw.edu](mailto:smitay@uw.edu)*

### **Supplementary Information**

1. Supplementary Figures S1-S3
2. Supplementary Figure Legends
3. Movie Legends movie1-6

## Supplementary Figure Legend

### Figure S1. TAOK2 localizes to the ER membrane (related to main figure 1)

(A) Confocal images of HEK293T cells stained with antibodies against calreticulin (green) and TAOK2 (magenta). Higher magnification of peripheral ER (yellow box) is shown in the bottom row. RGB profiler in ImageJ was used to plot the colocalization of calreticulin (green) and TAOK2 (red) fluorescence intensities in the region highlighted by the yellow line. Scale is 5 $\mu$ m.

(B) HEK293T cells expressing ER marker EGFP-Sec22b were fixed and stained with antibodies against TAOK2 and DAPI, scale bar is 5 $\mu$ m. Higher magnification of peripheral ER (yellow box) is shown. RGB profiler in ImageJ was used to plot the colocalization of EGFP-Sec22b (green) and TAOK2 (red) fluorescence intensities in distinct subdomains for the region highlighted by the yellow lines. Scale bar is 5 $\mu$ m.

### Figure S2. TAOK2 C-terminal tail protein purification and generation of TAOK2 knockout cell line (related to main figure 2 and 4)

(A) Coomassie stained gels showing eluate fractions obtained after affinity purification of GST (left) and GST-TAOK2-C (right) proteins. Fraction E4 was concentrated and used for downstream microtubule binding assays. Molecular weight proteins ladder is shown on the left.

(B) Genomic structure of TAOK2 as visualized through the UCSC genomic browser, shows the exons in gray, and region targeted by RNA guides (yellow and blue) is marked by scissors. The resulting deletion caused by genomic editing is shown in red, and premature stop codon is marked by the magenta box.

(C) Sequence peaks show the result of DNA sequencing in wildtype and two separate KO cell lines performed after PCR of the surrounding genomic region. The change in sequence is shown in gray.

**Figure S3. Effect of kinase dead TAOK2 K57A on microtubule dynamics** (related to main figure 6)

(A) Microtubule directional persistence calculated as a fraction of perpendicular distance between start/end points and the length of the actual path taken is plotted for cells expressing TAOK2-WT and TAOK2-K57A. Values indicate mean  $\pm$  S.E.M., n=10 cells with at least 5 comet paths measured per cell, two tailed t-test.

(B) Percent total time spent by EB3 comet pausing (no growth) is plotted for TAOK2-WT and TAOK2-K57A expressing cells. Values indicate mean  $\pm$  S.E.M., n=10 cells with at least 5 comet paths measured per cell, two tailed t-test.

## Movie Legends

### **Supplementary Movie 1.** (related to Figure 1)

TAOK2 is an ER protein. Combined time-lapse image stacks obtained on CSU-W1 SoRa superresolution confocal microscope show representative HEK293T cell transfected with GFP-TAOK2 (yellow) and ER-mRFP (magenta) to visualize the dynamics of TAOK2 on ER membranes. Image stacks were acquired every 2 sec. Movie compiled at 8 frames per sec (fps). Scale bar = 1 $\mu$ m.

### **Supplementary Movie 2.** (related to Figure 3)

TAOK2 is an ER-MT tether. Combined time-lapse image stacks show representative HEK293T

cell transfected with GFP-TAOK2 and ER-mRFP. Cells were incubated with a MT binding dye (405nm excitation) for 30min prior to acquiring images on a confocal microscope. Triple channel images were acquired at a single focal plane every 2s to simultaneously visualize TAOK2 (yellow), ER (magenta), and microtubules (cyan). Note localization of TAOK2 punctae at points of contact between ER and microtubules. Movie compiled at 8fps. Scale bar = 2 $\mu$ m.

**Supplementary Movie 3.** (related to Figure 3)

Aberrant unregulated TAOK2 tethering disrupts ER-MT dynamics. Combined time-lapse image stacks show representative HEK293T cell transfected with GFP-TAOK2(1146-1235), ER-mRFP (magenta) and stained with microtubule dye (cyan) to visualize the dynamics of ER membranes and MT growth. Complete absence of ER motility in presence of TAOK2 tether can be compared to normal ER membrane dynamics in an adjacent cell not transfected with GFP-TAOK2 (1145-1235) construct. Image stacks were acquired every 2 sec. Movie compiled at 8 frames per sec (fps).

**Supplementary Movie 4.** (related to Figure 4)

Combined time lapse-image stacks show representative wildtype and TAOK2 knockout cell transfected with EGFP-Sec22b (cyan) and mCherry-EB3 (red) to visualize the dynamics of ER membranes and MT growth. Image stacks were acquired every 2 sec. Movie compiled at 8 frames per sec (fps).

**Supplementary Movie 5.** (related to Figure 6)

Combined time-lapse image stacks show representative HEK293T cell transfected with TAOK2-WT, EGFP-Sec22b (magenta) and mCherry-EB3 (blue-green) to visualize the dynamics of ER membranes and MT growth. Image stacks were acquired every 2 sec. Movie compiled at 8 frames per sec (fps).

**Supplementary Movie 6.** (related to Figure 6)



Combined time-lapse image stacks show representative HEK293T cell transfected with TAOK2-K57A, EGFP-Sec22b (magenta) and mCherry-EB3 (blue-green) to visualize the dynamics of ER membranes and MT growth. Image stacks were acquired every 2 sec. Movie compiled at 8 frames per sec (fps).
